1 **Title**

2 Molecular determinants of enterotoxigenic *Escherichia coli* heat-stable toxin secretion and  
3 delivery

4  
5 Yuehui Zhu<sup>1a</sup>, Qingwei Luo<sup>1a</sup>, Sierra M. Davis<sup>1</sup>, Chase Westra<sup>1b</sup>, Tim J. Vickers<sup>1</sup>, and James M.  
6 Fleckenstein<sup>1, 2</sup>.

7  
8  
9 <sup>1</sup>Division of Infectious Diseases, Department of Medicine, Washington University School of  
10 Medicine, Saint Louis, Missouri, <sup>2</sup>Medicine Service, Department of Veterans Affairs Medical  
11 Center, Saint Louis, Missouri.

12  
13 <sup>a</sup>these authors contributed equally to the development of this manuscript

14  
15 <sup>b</sup>present author address:  
16 University of Illinois College of Medicine  
17 Chicago, Illinois

18  
19 Correspondence:

20  
21 James M. Fleckenstein  
22 Division of Infectious Diseases  
23 Department of Medicine  
24 Washington University School of Medicine  
25 Campus box 8051  
26 660 South Euclid Avenue  
27 Saint Louis, Missouri 63110.

28  
29 p 314-362-9218  
30 [jfleck@wustl.edu](mailto:jfleck@wustl.edu)

31

32 **Abstract**

33 Enterotoxigenic *Escherichia coli* (ETEC), a heterogeneous diarrheal pathovar defined by  
34 production of heat-labile (LT) and/or heat-stable (ST) toxins, remain major causes of mortality  
35 among children in developing regions, and cause substantial morbidity in individuals living in or  
36 traveling to endemic areas. Studies demonstrating a major burden of ST-producing ETEC have  
37 focused interest on ST toxoids for ETEC vaccines. We therefore examined fundamental aspects  
38 of ETEC ST biology using ETEC H10407, which carries *estH* and *estP* genes encoding ST-H and  
39 ST-P, respectively, in addition to *eltAB* genes responsible for LT. In this background, we found  
40 that deletion of *estH* significantly diminished cGMP activation in target epithelia, while deletion  
41 of *estP* had a surprisingly modest impact, and a dual *estH/estP* mutant was not appreciably  
42 different than the *estH* mutant. Nevertheless, either ST-H or ST-P recombinant peptides  
43 stimulated cGMP production. We also found that the TolC efflux protein was essential for both  
44 toxin secretion and delivery, providing a potential avenue for efflux inhibitors in treatment of  
45 acute diarrheal illness. In addition, we demonstrated that the EtpA adhesin is required for  
46 optimal delivery of ST and that antibodies against either the adhesin or ST-H significantly  
47 impaired toxin delivery and cGMP activation in target T84 cells. Finally, we used FLAG epitope  
48 fusions to demonstrate that the ST-H pro-peptide sequence is secreted by the bacteria,  
49 potentially providing additional targets for antibody neutralization. These studies collectively  
50 extend our understanding of ETEC pathogenesis and potentially inform additional avenues to  
51 mitigate disease by these common diarrheal pathogens.

52

53

## 54 Introduction

55

56 Diarrheal illnesses in low income countries continue to cause substantial morbidity and remain

57 one of the leading causes of death in young children in developing countries under the age of

58 five years. Among the bacterial causes of diarrheal illness enterotoxigenic *Escherichia coli* (ETEC)

59 are commonly linked to more severe forms of illness in young children(1). These organisms are

60 perennially the most common cause of diarrhea in those who travel to endemic areas where

61 sanitation is poor(2, 3), however they have been identified repeatedly as the etiology of

62 diarrheal outbreaks and sporadic cases of illness in industrialized countries including the U.S(4-

63 8).

64 Acute clinical presentations of ETEC infection may range from mild self-limited illness to severe

65 cholera-like diarrhea(9-11). In addition, ETEC and other diarrheal pathogens have been linked

66 to pernicious sequelae of malnutrition, growth stunting, and impaired cognitive(12)

67 development. Presently, there are no vaccines to protect against these common infections.

68 ETEC are a genetically(13) and serotypically (14) diverse pathovar of *E. coli* defined by the

69 production of heat-labile (LT) and/or heat stable (ST) enterotoxins which activate production of

70 host cyclic nucleotides to alter intestinal salt and water transport that culminate in net fluid

71 losses and diarrhea.

72 Heat-stable toxins are synthesized as 72 amino acid proteins consisting of a signal peptide, a

73 pro peptide and a carboxy terminal region of 18-19 amino acids, which forms the mature active

74 enterotoxin(15). Two enterotoxins cause disease in humans: STp (ST1a) 18 amino acids, and

75 STh (ST1b) 19 amino acids. Both mature toxins contain four cysteine residues which form two

76 intramolecular disulfide bonds. Their overall structure is shared with two homologous

77 mammalian peptides, guanylin and uroguanylin. Each of the bacterial and mammalian peptides

78 binds to guanylate cyclase C(16, 17), leading to increases in intracellular cGMP(18). Increases in

79 this cyclic nucleotide result in activation of protein kinases which phosphorylate and activate  
80 the cystic fibrosis transmembrane regulatory(CFTR) channel, and inhibit sodium-hydrogen ion  
81 exchange([19](#)). These effects lead to a net loss of salt and water into the intestinal lumen with  
82 ensuing watery diarrhea.

83 Bacteria producing any of the toxins LT, STh, or STp have been linked to diarrheal illness in  
84 humans([20-23](#)), and recent studies suggest that ST-producing ETEC are commonly represented  
85 among the pathogens that cause severe diarrheal illness among young children in low income  
86 countries leading to substantial interest in the development of a vaccine that incorporates ST-  
87 toxoids([24](#)).

88 Enterotoxigenic *E. coli* strain H10407, originally isolated from a case of severe cholera-like  
89 diarrheal illness in Bangladesh, is to date the most extensively characterized isolate of this  
90 pathovar. Interestingly, this isolate encodes all three enterotoxins associated with ETEC  
91 diarrheal illness in humans([25, 26](#)), with the gene for STh on the largest 94,797 bp virulence  
92 plasmid ([NCBI Genbank accession NC\\_017724.1](#)), and the genes for both LT and STp on a  
93 66681 bp plasmid([27](#)). H10407 is frequently used as the challenge strain in controlled human  
94 infection models to test candidate vaccines. Therefore, we set out to examine the relative  
95 contribution of STh and STp to activation of cGMP in host epithelia by H10407, and the ability  
96 of anti-ST and anti-adhesin antibodies to mitigate effective toxin delivery by the bacteria.

97

98

## 99 **Materials and methods**

### 100 **Bacterial strains and growth conditions**

101 Bacterial strains used are listed in Table 1. For general purposes, ETEC bacteria were grown in  
102 lysogeny broth at 37°C overnight from frozen glycerol stocks. To optimize synthesis and  
103 secretion of ST toxin, bacteria were grown in Casamino Acids-yeast extract –sucrose medium  
104 (CAYE-ST) (2% Casamino acids, 0.6% Yeast extract, 43mM NaCl, 38mM K<sub>2</sub>HPO<sub>4</sub>, 203mM  
105 MgSO<sub>4</sub>, 25mM MnCl<sub>2</sub>, 18mM FeCl<sub>3</sub>, 2% sucrose) at 37°C overnight from frozen glycerol stocks.

### 106 107 **Construction of mutants lacking production and secretion of heat stable toxins**

108 Lamda red recombinase mediated recombination(28) was used to disrupt genes encoding heat  
109 stable toxins in H10407. In brief, we used the primers jfo70212.1 and jfo70212.2 to amplify the  
110 kanamycin cassette from pKD13 with 36 bp overhang sequence from *estH* gene, and primers of  
111 jfo70212.3 and jfo70212.4 to amplify kan cassette from pKD13 with 36 bp overhang sequence  
112 from *estP* gene. The PCR product was electroporated into competent H10407 containing helper  
113 plasmid pKD46, and selected on LB plate with 50 µg/ml kanamycin. Kanamycin-resistant  
114 colonies were screened by PCR with primers of jfo71612.1 and jfo71612.2 for the *estH* locus, and  
115 primers of jfo71612.3 and k2 for *estP*. The deletion mutants were further confirmed by toxin  
116 multiplex PCR as previously described (29).

117 To construct complemented strains, we amplified the *estP* gene with primers jfo72412.3 and  
118 jfo60614.1 for cloning into XhoI site of pBAD/mycHisA, yielding pSMD002; *estH* was amplified  
119 with primers of jfo72414.5 and jfo72414.6 and cloned into the EcoRV site of pACYC184 to  
120 produce pSMD001. We also cloned *estH* and *estP* genes individually and together in pETDuet-1  
121 at NcoI & EcoRI sites and BglII & XhoI sites with primer pairs of jfo60614.2 and jfo60614.3,  
122 jfo60614.4 and jfo60614.5, respectively. This resulted in plasmids pQL230 (*estP*), pQL231(*estH*),

123 and pQL238 (*estP/estH*) ([table 1](#)). After confirmation by sequencing, the respective plasmids  
124 were transformed into the deletion strains, and complementation confirmed by PCR.  
125 To generate an ETEC *tolC* deletion mutant, primers jf110716.44 /45 were first used to amplify a  
126  $\Delta tolC_{732}:: Km^R$  fragment from JQ55031([30](#)). Next, the regions flanking *tolC* in the H10407  
127 genome were amplified with primer pairs jf110716.38/ jf110716.43 and jf110716.46/ jf110716.39  
128 to amplify 1027 bp of upstream and 985 bp of downstream sequence, respectively. The three  
129 resulting fragments were then fused by PCR with primer pairs jf110716.38/ jf110716.39, using  
130 high-fidelity polymerase Phusion (Thermo Fisher Scientific), with denaturing for 2 min at 98°C,  
131 followed by 30 cycles of 10 s at 98°C, 30 s at 65°C, and 1.5 min at 72°C, and a final extension for  
132 10 min at 72°C. The resulting 3,325-bp amplicon was then introduced into H10407(pKD46) as  
133 described above. Kanamycin resistant, Ampicillin sensitive colonies were then screened by  
134 colony PCR using primer pair jf112016.50/51 flanking the entire amplicon for a 4269-bp product,  
135 and primers jf101716.21/22 specific to *tolC* gene (603-bp product). Primers k2/jf112016.51  
136 (2,024-bp product) were then used to confirm the *tolC* gene deletion and the  $Km^R$  cassette  
137 integration in the H10407 genome. To complement the *tolC* mutant, the *tolC* gene was  
138 amplified from H10407 genomic DNA using primers jf120716.59/jf120716.60, and the plasmid  
139 vector backbone was amplified from plasmid pBAD/myc-His B using primers  
140 jf120716.52/jf120716.53. The recombinant pYZoo8 complementation plasmid was assembled  
141 using an adaptation of circular polymerase extension cloning (CPEC) ([31](#)) (30 s denaturation at  
142 98°C, followed by 20 cycles of 10 s at 98°C, 30 s at 55°C, and 1.5 min at 72°C, and a final  
143 extension for 10 min at 72°C.). Following sequence verification, pYZoo8 or the pBAD/myc-His B  
144 vector control plasmids were then used to transform the  $\Delta tolC$  mutant. Complementation was  
145 confirmed by PCR with primers jf101716.21/22.

146 **FLAG-STH fusions**

147 FLAG epitope fusions were constructed to introduce the 3X FLAG sequence between the signal  
148 peptide of *estH* and the beginning of the propeptide encoding region (on plasmid pFLAG<sup>3</sup>-STH)  
149 or at the 3' end of *estH* (on pSTH-FLAG<sup>3</sup>). The 3X FLAG fragment was 1<sup>st</sup> constructed by  
150 annealing complementary synthetic oligonucleotides jf092616.9 encoding + strand bases 1-43  
151 and jf092616.10 representing– strand bases 66-19 of a 66 base pair sequence encoding the 3x  
152 FLAG peptide (DYKDHDGDYKDHDIDYKDDDDK).

153 To generate plasmid pFLAG<sup>3</sup>-STh where the 3xFLAG encoding sequence was inserted between  
154 the STh signal peptide and the STh propeptide, primers jf101916.33/ jf092616.4 were first used  
155 to amplify the nucleotides (1-63) of *estH* encoding the signal peptide. Next primers jf092616.1/  
156 jf092616.2 were used to amplify the 3xFLAG fragment from the above synthetic  
157 oligonucleotide 3XFLAG template flanked by nucleotide extensions representing nucleotides  
158 44-60 and 64-99 of *estH*, while primers jf092616.3/ jf101916.34 were used to amplify the 3' end  
159 of *estH* from nucleotide 64 to the native stop codon. The three fragments were fused in a single  
160 PCR reaction using primers jf101916.33/jf101916.34. Next, the vector backbone was amplified  
161 using primers jf101916.31/ jf101916.32 from pFLAG-CTC (Sigma), followed by final assembly of  
162 pFLAG<sup>3</sup>-STh by CPEC. Similarly, to make plasmid pSTh-FLAG<sup>3</sup> primers jf092616.5/ jf101916.35  
163 were used to amplify 3XFLAG with a 5' nucleotide extension representing nucleotides 197-216  
164 of *estH*, while primers jf101916.33/jf092616.8 were used to amplify the *estH* gene with a 5'  
165 nucleotide extension corresponding to pFLAG-CTC. The resulting amplicons were then fused in  
166 a single PCR reaction using primers jf101916.33/ jf101916.35, and assembled with the pFLAG-  
167 CTC backbone by CPEC.

168

169 **Cloning, expression, and purification of recombinant ST proteins peptides**

170 To construct a GST-STh or mutant GST-mSTh (A14Q) expression plasmid, synthetic  
171 oligonucleotides were synthesized (IDT, Coralville, Iowa) which encompassed the region of the  
172 *estH* gene corresponding to the mature peptide minus the native start codon, preceded by an  
173 in-frame flexible linker sequence (32). The forward sequence (jfo42715.1 for STh and jfo42517.1  
174 for mSTh), preceded by a *BamHI* overhang sequence (GATCC) and the reverse sequence  
175 (jfo42715.2 for STh and jfo42517.2 for mSTh), preceded by an *EcoRI* overhang sequence  
176 (AATTC) were mixed in 1:1 molar ratio, heated to 95° C for 5 minutes, and cooled to room  
177 temperate. The annealed double stranded 91 base pair DNA fragments were then cloned  
178 directly into the pGEX-4T1 vector digested with *BamHI* and *EcoRI*, yielding plasmids pCW002  
179 and pYZ011, respectively. A similar strategy was to construct a GST-STp expression plasmid  
180 using forward oligonucleotide jfo31915.5 and the reverse sequence jfo31915.6, resulting in  
181 plasmid pCW003. *E. coli* TOP10(pCW002), TOP10(pCW003), and TOP10(pYZ011) were then  
182 used to express recombinant GST-STh, GST-STp, or GST-mSTh, and the resulting fusion  
183 proteins were purified by affinity chromatography. In brief, the bacterial cultures were grown in  
184 Luria broth at 37°C to an OD<sub>600</sub> between 0.6 and 0.7, and induced with 1 mM IPTG final  
185 concentration for 1-3 hours. The cell pellets were re-suspended in 30 ml cold PBS containing 5  
186 mM DTT, 1 protease inhibitor tablet (Roche), and 0.1 mg/ml lysozyme. Following sonication,  
187 supernatants were clarified by centrifugation at 12,000 rpm for 20 minutes at 4°C, followed by  
188 passage through a 0.45 µm filter. Filtered supernatants were then loaded onto columns  
189 (Glutathione Sepharose High Performance, GE Healthcare) pre-equilibrated with phosphate  
190 buffered saline (PBS), pH 7.3 (140 mM NaCl, 2.7 mM KCl, 10 mM Na<sub>2</sub> HPO<sub>4</sub>, 1.8 mM KH<sub>2</sub> PO<sub>4</sub>,  
191 pH 7.3). After washing with 20 column volumes of PBS containing 1 mM dithiothreitol (DTT),



192 GST fusion proteins were eluted in fresh buffer containing (100 mM Tris-HCl, pH 8.0 and 10 mM  
193 reduced glutathione), and dialyzed against PBS.

194  
195 To liberate native STh or mutant STh (mSTh) from its GST fusion partner, GST-fusion protein  
196 was dialyzed in 50 mM  $\text{NH}_4\text{HCO}_3$  (pH 8.5), containing 1 unit of thrombin (Sigma) per mg GST-  
197 fusion protein at 4°C overnight, centrifuged at 4000 x g for 20 minutes a 10 kDa MWCO  
198 centrifugal filter to collect the filtrate, and dried by vacuum centrifugation. Peptide  
199 concentrations were then determined by measurement of the molar extinction coefficient at  
200 280 nm ([Take3, BioTek](#)).

201 Plasmids pCW002, and pCW003 have been deposited in Addgene (<https://www.addgene.org/>)  
202 under accession numbers 90225, and 90226, respectively.

### 203 **transcriptional analysis of *estH*, *estP* and *tolC* genes**

204 Confluent T84 cells were infected with early-log phase H10407 bacteria ( $\sim 10^9$  cfu) for 30 or 90  
205 min. Total RNA was isolated from adherent and planktonic (nonadherent) bacterial fractions  
206 using an RNeasy Mini Isolation Kit (GE Life Sciences, [25050070](#)) and treated with DNase I  
207 (ThermoFisher, [18068015](#)). PCR for the *arcA* housekeeping gene was used to confirm the  
208 removal of DNA. Total RNA was reverse-transcribed (SuperScript VILO cDNA Synthesis Kit,  
209 ThermoFisher, [11754250](#)). RNA transcripts were quantified by real-time PCR (Fast SYBR Green  
210 Master Mix, ThermoFisher, [4385612](#); ViiA 7 Real-Time PCR system, [Applied Biosystems](#)).  
211 Primers specific to *arcA*, *estH*, *estP*, or *tolC* gene are listed in Table 2. All transcripts were  
212 normalized to *arcA*, and presented as a ratio of transcripts in adherent bacteria relative to that  
213 of planktonic bacteria.

### 214 **Production and purification of anti-ST polyclonal antibody**

215 To generate rabbit polyclonal antibody which recognizes ST-H, New Zealand white rabbits  
216 were immunized ([Rockland](#)) with recombinant GST-ST-H. We used lyophilized *E. coli*

217 AAEC191A (33), and an immobilized *E. coli* lysate column (Pierce 44938) to absorb *E. coli*-  
218 reactive antibodies, followed by protein G column purification (HiTrap, GE [17-0404-01](#)). IgG  
219 GST-ST-H antibodies were affinity purified using GST-STh immobilized on nitrocellulose as  
220 previously described and anti-GST-reactive antibodies were removed by cross-absorption  
221 against GST coupled to Glutathione Agarose Resin (Gold Bio [G-250-100](#), St. Louis).  
222 Anti-STp antibody, was purified from rabbit antisera (provided by Weiping Zhang, Kansas State  
223 University) by cross-absorption against an immobilized *E. coli* lysate column and then followed  
224 by affinity purification against recombinant GST-STp) immobilized on nitrocellulose  
225 membranes for affinity purification.

#### 226 **Immunoprecipitation and detection of heat-stable toxins in culture supernatants**

227 Purified anti-STh polyclonal IgG was immobilized with AminoLink Plus Coupling Resin (Pierce  
228 Direct IP kit Thermo Scientific, [26148](#)). Clarified culture supernatants of overnight cultures of  
229 ETEC were mixed with protease inhibitor cocktail (ThermoFisher [88666](#)), and filtered through a  
230 0.45 µm filter. Sixty ml of supernatant was then filtered through 10 kDa molecular weight cutoff  
231 membrane (Amicon). Filtrates were then dried by vacuum centrifugation, and dialyzed in PBS  
232 against a 1 kDa-cutoff membrane ([Float-A-Lyzer G2, MWCO 0.5-1 kDa, Spectrum Labs](#)).  
233 Immunoprecipitations were conducted by incubation of filtrates with anti-STh immobilized  
234 resin for 2 hours at room temperature followed by elution with 4.5% acetic acid. Eluates were  
235 dried by under vacuum centrifugation, and reconstituted in PBS. Immunoprecipitated samples  
236 or purified protein/peptide as controls were applied directly to 0.22 µm pore-size PVDF  
237 membranes (Bio-Rad), and detected by anti-STh and/or anti-STp primary antibody and anti-  
238 Rabbit-HRP conjugated secondary antibody using Clarity Western ECL Substrate (Bio-Rad).  
239 FLAG-STh fusion peptides were prepared from strain jf2847 carrying pFLAG<sup>3</sup>-STh, pSTh-FLAG<sup>3</sup>,  
240 or the blank vector pFLAG-CTC. Briefly, following overnight growth at 37°C in lysogeny broth

241 containing ampicillin (100 µg/ml), cultures were diluted 1:100 in fresh media, grown to OD<sub>600</sub> of  
242 ~0.2, then induced with 1 mM IPTG for 7 h. 40 ml of clarified supernatant was mixed with 200 µl  
243 of anti-FLAG (M2) affinity gel (#A2220, Sigma), then incubated overnight at 4°C with agitation.  
244 After washing with TBS buffer, bound proteins were eluted with 0.1M glycine-HCl, pH 3.5,  
245 separated by SDS-PAGE, transferred to nitrocellulose for subsequent immunoblotting, and  
246 detected by anti-FLAG antibody (#F1804, Sigma).

#### 247 **Confocal immunofluorescence imaging and quantification**

248 To examine the delivery of FLAG-tagged STh toxin to intestinal epithelial cells, *estP/estH*  
249 mutant strains with or without plasmids encoding FLAG-tagged STh were grown overnight and  
250 diluted 1:50 in CAYE-ST medium, grown to OD<sub>600</sub> of ~0.2, then induced with 1 mM IPTG for 2 h.  
251 The bacteria were added to T84 cells at a multiplicity of infection (MOI) of ~1:50, maintaining  
252 the induction with 1 mM IPTG. After infection with the bacteria, T84 cells were washed with  
253 PBS, fixed with 4% paraformaldehyde for 10 min at room temperature, permeabilized with  
254 0.1% TRITON X-100 for 5 min, blocked with 1.5% BSA/PBS at 37°C for 1 h. Anti-O78 rabbit  
255 polyclonal antisera (Penn State University) diluted 1:300 in PBS with 0.02% Tween-20 (PBST)  
256 and 1.5% BSA was used to identify H10407 and monoclonal Anti-FLAG M2 antibody (#F1804,  
257 Sigma) diluted 1:500 in PBST with 1.5% BSA to detect FLAG-tagged STh. Following incubation  
258 overnight at 4°C, slides were washed 3x with PBS, and incubated for 1 hour at 37°C with goat-  
259 anti rabbit IgG (H&L) AlexaFluor-488 conjugate (ThermoFisher [A11070](#)) and goat-anti mouse  
260 IgG (H&L) conjugated to AlexaFluor 594 (ThermoFisher [A11032](#)) at a dilution of 1:500 in PBST  
261 containing 1.5% BSA. After washing, DAPI (4', 6-diamidino-2-phenylindole) was added at 1:  
262 6,000. Confocal microscopy images were acquired using a [Nikon C2+ Confocal Microscope](#)  
263 [System](#). To quantitate binding of FLAG-epitope tagged STh molecules, fluorescence detection  
264 was normalized to the DAPI signal using NIS-Elements DUO software (v4.4).

## 265 **In vitro assessment of toxin delivery**

266 T84 (ATCC® CCL-248™) intestinal epithelial cells were maintained in DMEM/F12 (1:1) medium  
267 containing FBS (5% [vol/vol]). T84 cell monolayers were grown in 96 well plates for 24-48 hours  
268 at 37°C, 5% CO<sub>2</sub> incubator, to > 90% confluency. Cultures of bacteria were grown overnight in  
269 lysogeny broth from frozen glycerol stocks in CAYE-ST medium. Phosphodiesterase inhibitors  
270 vardenafil hydrochloride trihydrate ([#Y0001647](#)), rolipram ([#R6520](#)), and cilostazol ([#C0737](#))  
271 (all from Sigma-Aldrich), were each added to target T84 cells at a final concentration of 16.7 or  
272 50 µM and incubated with cells for one hour. Bacteria or toxin were added to T84 monolayers  
273 seeded into 96-well plates and continued the treatment for the indicated duration. After  
274 washing in PBS cyclic GMP (cGMP) levels were determined by enzyme immunoassay (EIA)  
275 ([Arbor Assays, Ko20-H1](#)) using the acetylated protocol as directed by the manufacturer.  
276 To examine the capacity of antibodies to neutralize ST delivery, antibody against ST-H and/or  
277 EtpA was added directly to T84 cell monolayers at the indicated dilution at the time of  
278 infection. After 1.5 hours, cells were washed by PBS, and lysed, and cGMP assays were  
279 performed as described above.

280

## 281 **Results**

### 282 **contribution of ST-H, ST-P and EAST1 to activation of cGMP in target epithelial cells**

283 Understanding the individual contributions of ST and ST-like molecules of ETEC is relevant to  
284 development and testing of toxin neutralization strategies. H10407 encodes three peptides  
285 with the potential to activate cGMP in target intestinal epithelial cells: ST-H<sub>1</sub>, ST-P, and EAST<sub>1</sub>,  
286 a heat stable toxin originally identified in enteroaggregative *E. coli* ([34](#)). ST-H (ST-1b) is  
287 encoded by the *estH* gene on the large 94,797 bp p948 plasmid ([NCBI Genbank accession](#)  
288 [NC\\_017724.1](#)). The *astA* gene which encodes EAST<sub>1</sub> peptide ([35](#)) is imbedded within a IS<sub>1414</sub>  
289 insertion sequence([36](#)) is also located on the p948 plasmid immediately downstream from the

290 *etpBAC* adhesin locus(27, 37). ST-P (ST-1a) is encoded by the *estP* gene on a second 66 kb  
291 virulence plasmid [NCBI GenBank FN649417.1](#) in H10407.  
292 We found that deletion of *estH* resulted in appreciable decreases in cGMP production at or near  
293 background levels of cGMP production by uninfected cells, and that complementation of *estH*  
294 in trans restored activation of this cyclic nucleotide ([Figure 1A](#)). In contrast, the *estP* mutant was  
295 not appreciably different than the wild type strain, and the introduction of the *estP* mutation to  
296 the *estH* strain did not yield further measurable decreases in cGMP production by target  
297 epithelial cells. However, we found that the target T84 cells used in these assays did respond to  
298 GST fusions to either ST-H or ST-P ([Figure 1B](#)) suggesting that these cells have the capacity to  
299 respond to either peptide. Interestingly, we found that in contrast to *estH*, *estP* transcription  
300 was significantly influenced by bacterial cell contact with transcription of the gene encoding  
301 ST-P enhanced by bacterial adhesion, as was the *tolC* gene which encodes the putative export  
302 channel for ST ([Figure 1C](#)). Deletion of *astA* gene encoding EAST on the pg48 plasmid did not  
303 impact bacterial activation of cellular cGMP under the conditions of the assay ([Figure 1D](#)).

304

### 305 **TolC is required for effective ETEC secretion of ST1 toxins**

306 The precise mechanism for secretion of heat stable toxins from ETEC strains associated with  
307 disease in humans is presently uncertain. Prior studies of heat-stable toxin investigated the  
308 secretion STb(ST-II)(38), or STp(STIa)(39) from laboratory strains of *E. coli* containing  
309 recombinant expression plasmids. While both studies suggested that the outer membrane  
310 protein TolC is involved in secreting these toxins from the recombinant *E. coli* background,  
311 there is conflicting data regarding the involvement of the STb (STII) toxin in human disease(40,  
312 41), and unlike the ST1 toxins, STb does not bind to guanylate cyclase C. Similarly, to our  
313 knowledge, there has been no verification of the role of *tolC* in mediating the secretion of either

314 of the ST<sub>1</sub> toxins (ST<sub>h</sub> and ST<sub>p</sub>) from strains of ETEC isolated from humans. Therefore, to verify  
315 the importance of the TolC in secretion of both ST<sub>h</sub> (ST<sub>1b</sub>) and ST<sub>p</sub>(ST<sub>1a</sub>) from ETEC which  
316 cause human illness, we constructed an isogenic *tolC* mutant in the ETEC H10407 strain, and  
317 tested the ability of the mutant bacteria to deliver ST to target epithelial cells.

318 We found that mutants lacking *tolC* were markedly deficient in their ability to deliver ST toxins  
319 to epithelial monolayers as we observed only background levels of cGMP production following  
320 infection with the *tolC* mutant strain, and complementation with *tolC in trans* restored the  
321 ability of the bacteria to provoke a cGMP response in targeted cells ([Figure 2](#)).

### 322 **Optimal delivery of ST requires the EtpA adhesin.**

323 We have previously demonstrated that intimate interaction of ETEC with intestinal epithelial  
324 cells is essential for efficient delivery of heat labile toxin to intestinal epithelial cells([42](#)).  
325 Moreover, delivery of LT requires the concerted action of several ETEC adhesins with different  
326 receptor specificities. To examine the dependence of ST delivery on bacterial adhesion we  
327 compared cGMP activation of target intestinal epithelial cells by wild type ETEC to a mutant  
328 strain lacking EtpA, a plasmid-encoded adhesin, expressed by a diverse population of ETEC([43](#)).  
329 These studies demonstrated that cGMP activation in target epithelia by wild type bacteria was  
330 significantly accelerated relative to the *etpA* mutant ([Figure 3](#)) suggesting that efficient delivery  
331 of these small peptides also requires effective bacterial-host interactions.

### 332 **Anti-toxin and anti-adhesin antibodies mitigate delivery of heat-stable toxins**

333 ETEC delivery of heat labile toxin can be effectively blocked by antibodies directed against  
334 either LT or the EtpA adhesin molecule([44](#)). These data suggest that anti-adhesin and anti-  
335 toxin strategies could provide complementary approaches to vaccine development. The *etpA*  
336 gene, like those encoding LT, and ST<sub>1</sub> molecules appears to be highly conserved within the

337 ETEC pathovar(43). Therefore, we examined the ability of antibodies against the EtpA adhesin  
338 to inhibit activation of cGMP in target intestinal cells.

339 Antibodies directed against either the EtpA adhesin molecule or STh significantly inhibited the  
340 delivery of heat-stable toxins to target cells (Figure 4). Although we were not able to  
341 demonstrate that the combination of these antibodies was synergistic, these data add  
342 additional support to the concept that EtpA could be useful as a target to engender coverage  
343 against a wide variety of ETEC isolates that produce heat-stable and/or heat-labile  
344 enterotoxins(43, 45).

#### 345 **Delivery and secretion of epitope-tagged ST-H**

346 Understanding the nature of ST secretion and its delivery to epithelial receptors could be  
347 relevant to informed development of ST toxoid molecules. ST-H is synthesized as a 72 amino  
348 acid molecule that includes a 19 amino acid signal peptide, followed by a 34 amino acid pro-  
349 peptide, and a mature ST molecule of 19 amino acids. Although most attempts to develop ST  
350 toxoids have targeted the mature peptides, there are earlier, but conflicting data regarding the  
351 precise form of ST that is secreted into the extracellular milieu (15, 46), with some data  
352 suggesting that the pro-peptide may be exported with subsequent processing to the mature  
353 peptide outside the bacteria (47). To investigate the potential secretion of the pro-peptide, we  
354 engineered 3x-FLAG-epitope fusions to the amino terminal end of the pro-peptide region  
355 (FLAG<sup>3</sup>-pro-ST-H) of ST-H and compared the export, and delivery of the resulting peptides to  
356 carboxy-terminal fusions to the mature peptide (pro-ST-H-FLAG<sup>3</sup>, schematic, figure 5).

357 We were able to recover either the amino-terminal or carboxy-terminal FLAG-tagged  
358 molecules from culture supernatants of *estH/estP* mutant ETEC transformed with the pST-  
359 FLAG<sup>3</sup> or pFLAG<sup>3</sup>-STH plasmids, respectively (figure 5a). Both molecules appeared to yield  
360 functional ST mature peptides as either plasmid was sufficient to complement the ability of  
361 *estH/estP* to activate cGMP in target epithelial cells (figure 5b). Likewise, we were able to

362 demonstrate binding of FLAG-epitope tagged molecules to target epithelial cells following  
363 infection with either of the complemented strains ([figure 5c, d](#)). Collectively, these data appear  
364 to reaffirm earlier observations of STA<sub>3</sub> (ST-H)<sup>(47)</sup> suggesting that both the mature form (19  
365 amino acids) of the peptide and the extended Pro-ST-H (53 amino acids) may be found outside  
366 the bacteria.

367

368



## 369 Discussion

370 Because of the significant global burden of diarrheal illness caused by ETEC, these pathogens  
371 have been a target for vaccine development since they were first identified as a cause of severe  
372 diarrheal illness more than four decades ago. Currently, there is no vaccine available that  
373 affords broad-based protection against ETEC, in part due the substantial antigenic diversity  
374 within the pathovar, and limited mechanistic insight into immunologic correlates of protection  
375 that appears to follow early infections among young children endemic areas. Moreover, many  
376 features of the molecular pathogenesis of these common pathogens have not been explored in  
377 sufficient detail to inform vaccine development.

378 Because ST-producing ETEC comprise a large proportion of strains associated with  
379 symptomatic diarrheal illness(48), we investigated the molecular contributions of the known  
380 heat-stable toxins, their proposed secretion apparatus, and bacterial adhesion to toxin delivery.  
381 The present studies suggest that efficient delivery of ST toxins is a complex process that  
382 requires the ability to directly engage host cells and at least transient adhesion afforded by  
383 EtpA and other adhesins(49). Moreover, as antibodies directed at either the EtpA adhesin or ST  
384 effectively impaired toxin delivery, our studies provide further support for development of a  
385 vaccine platform that combines ST-toxoid(24) and anti-adhesin approaches.

386 Interestingly, clinical studies have suggested that either ST-H originally identified in humans  
387 and ST-P can cause diarrheal illness in humans(23). In keeping with these observations, we  
388 found no difference in the ability of ST-H or ST-P peptides to elicit cGMP activation(18) in  
389 target epithelia. Although deletion of the gene encoding ST-H resulted in lower cGMP  
390 activation in infected monolayers than when the ST-P gene was deleted from the ETEC H10407  
391 strain, we cannot exclude the possibility of a compensatory increase in ST-H secretion in the  
392 absence of a potentially competing peptide. Indeed, deletion of the *tolC* gene resulted in

393 complete abrogation of cGMP activation in target epithelial cells, similar to deletion of both of  
394 the ST1 toxin genes from H10407.

395 Earlier studies also noted that many ETEC strains including H10407 bear copies of an insertion  
396 sequence(36) that encompass the *astA* gene encoding EAST1(35), a cGMP activating peptide  
397 structurally similar to ST1 that was originally identified as a heat-stable enterotoxin in  
398 enteroaggregative *E. coli*(34). However, we saw no appreciable decrease in cGMP in target  
399 epithelial cells following infection with the *astA* mutant, compared to wild type ETEC. We  
400 cannot rule out the possibility of EAST1 expression from additional copies of *astA* not residing  
401 on the 92 MDa virulence plasmid, or that EAST1 is not optimally expressed *in vitro*. However,  
402 the complete absence of a cGMP response in cells infected with the ST-1a/ST-1b deletion  
403 mutant might alternatively suggest that EAST1 does not contribute to ETEC virulence and that  
404 further toxoid vaccine development can simply focus on engendering neutralizing antibody  
405 responses to the established ST1 and LT enterotoxins.

406 The reaffirmation of TolC as a key mechanism for export of ST1 toxins could be relevant to  
407 management of diarrheal illness. The rapid emergence of multi-drug resistance in the  
408 Enterobacteriaceae that is in part dependent on drug efflux through TolC has stimulated  
409 interest in efflux inhibitors to enhance the potency of available antimicrobial agents(50-52).

410 Theoretically, these inhibitors could offer novel therapeutic agents for treatment of ETEC.

411 Our studies also revisit the concept that the larger pro-peptide form of ST-H may be exported  
412 by the bacteria, and the data presented here are consistent with prior observations suggesting  
413 that some processing of the pro-peptide occurs outside the bacteria(15, 47). Further study will  
414 be needed however to determine whether the pro-peptide sequence contributes to  
415 immunologic recognition of ST following infection and whether these larger molecules might  
416 be exploited in the development of improved toxoids to neutralize ST.



418

## 419 Figure legends

420

### 421 **Figure 1. relative contribution of STh, STp, and EAST to cGMP production in target epithelia.**

422 **A.** cGMP activation of T84 target epithelial cells following infection with wild type *estH*,  
423 complemented *estH* mutant *estH*(pQL231), *estP*, the complemented *estP* mutant  
424 *estP*(pQL230), and the *estH/estP* dual deletion mutant.  $\emptyset$ =uninfected cells. **B.** cGMP production  
425 following the addition of GST, GST-STh, or GST-STp fusions. Numbers on the x-axis represent  
426 final concentration of protein in  $\mu\text{g/ml}$ .  $\emptyset$ =untreated cells. **C.** transcription of genes encoding ST  
427 toxins ST-H (*estH*), ST-P (*estP*) and TolC. Data are normalized relative to the *arcA* housekeeping  
428 gene, and represent the ratio of transcripts in attached to planktonic bacteria at 30 and 90  
429 minutes after infection of monolayers. Whisker plots represent the range of data obtained over  
430 six replicates from two independent experiments. Horizontal lines represent mean values. **D.**  
431 Activation of cGMP in T-84 cells after addition of wild type H10407, the *astA* mutant or the dual  
432 *estH/estP* mutant. Data for each group represent mean of  $n=3$  replicates  $\pm$  SEM.

433

434

### 435 **Figure 2 role of *tolC* in ST1 toxin secretion and delivery to target epithelial cells.**

436 **A.** Immunoblot detection of ST1 toxins in culture supernatants of the wild type H10407 strain,  
437 *tolC* mutant, or *estH/estP* dual deletion mutant following immunoprecipitation of culture  
438 supernatants with affinity-purified anti-STh antibodies (IP  $\alpha$ -STh). BSA and GST-STh fusion are  
439 shown as negative and positive controls, respectively. **B.** cGMP production by T84 target  
440 epithelial cells following infection with wild type (wt) ETEC strain H10407 (ST1a, ST1b), the *tolC*  
441 mutant, the vector complemented mutant (pBAD-Myc-HisB) or the *tolC*-complemented  
442 mutant (pZY008).

443

444 **Figure 3 The EtpA adhesin is required for optimal delivery of heat stable toxins**

445 Shown are comparisons of cGMP activation in target T8<sub>4</sub> intestinal epithelial cells following  
446 infection with wild type ETEC H10<sub>4</sub>07, or the *etpA* mutant (n=4 replicates). The *estH/estP* dual  
447 deletion mutant and uninfected monolayers (n=3). Dashed lines in each group connect  
448 geometric mean values obtained at 30, and 60 minutes following the addition of bacteria. \*  
449 represents p<0.05 obtained by Mann-Whitney, (two tailed) comparisons.

450

451

452 **Figure 4. antitoxin and anti-adhesin antibodies inhibit heat-stable toxin delivery**

453 Shown are monolayers infected with the dual heat-stable toxin mutant (*estH/estP*), wild type  
454 H10<sub>4</sub>07, or uninfected control monolayers (∅). Dotted horizontal lines for each group represent  
455 geometric means. (\*=0.028) by Mann Whitney two-tailed nonparametric comparisons.

456

457

458 **Figure 5. secretion and delivery of FLAG-epitope tagged ST-H.**

459 Schematic at top depicts the location of the region encoding the 3xFLAG peptide relative to the  
460 *estH* gene. The arrow at top shows the location of the predicted signal peptide cleavage site  
461 which is retained in both constructs. **a.** anti-FLAG and anti-STH immunoblots of FLAG<sup>3</sup>-STH  
462 and STH- FLAG<sup>3</sup> peptides recovered by anti-FLAG immunoprecipitation from culture  
463 supernatants of the ETEC *estH/estP* mutant bearing the pFLAG<sup>3</sup>-STH and pSTH- FLAG<sup>3</sup>. **b.**  
464 complementation of *estP/estH* mutant strain with pSTH- FLAG<sup>3</sup> or pFLAG<sup>3</sup>-STH restores  
465 toxicity upon infection of T8<sub>4</sub> cells. **c.** quantitation of FLAG<sup>3</sup> -tagged ST delivered to epithelial  
466 cells by *estH/estP* bacteria complemented with pSTH- FLAG<sup>3</sup> or pFLAG<sup>3</sup>-STH. Values represent  
467 fluorescence intensity per field. **d.** Confocal immunofluorescence images of bacteria expressing  
468 pST-FLAG<sup>3</sup> (anti-O78, yellow) attached to T8<sub>4</sub> cells (nuclei, blue) and the distribution of FLAG  
469 epitope-tagged toxin (cyan).



471 **tables**  
472 **table 1**

| table 1 bacterial strains and plasmids used in these studies                                                                                                                                                                                                                                                                                                                                                                                                                                                                                                                              |                                                                                                                                    |                             |
|-------------------------------------------------------------------------------------------------------------------------------------------------------------------------------------------------------------------------------------------------------------------------------------------------------------------------------------------------------------------------------------------------------------------------------------------------------------------------------------------------------------------------------------------------------------------------------------------|------------------------------------------------------------------------------------------------------------------------------------|-----------------------------|
| Strain or plasmid                                                                                                                                                                                                                                                                                                                                                                                                                                                                                                                                                                         | Description                                                                                                                        | Source or reference(s)      |
| <b>Strains</b>                                                                                                                                                                                                                                                                                                                                                                                                                                                                                                                                                                            |                                                                                                                                    |                             |
| H10407                                                                                                                                                                                                                                                                                                                                                                                                                                                                                                                                                                                    | Wild-type ETEC strain O78:H11; CFA/1; LT, ST-H, ST-P; EtpA                                                                         | (27, 37, 53)                |
| jf2656                                                                                                                                                                                                                                                                                                                                                                                                                                                                                                                                                                                    | H10407 derivative with isogenic deletion of <i>estP</i>                                                                            | This study                  |
| jf2649                                                                                                                                                                                                                                                                                                                                                                                                                                                                                                                                                                                    | H10407 derivative with isogenic deletion of <i>estH</i>                                                                            | This study                  |
| jf2847                                                                                                                                                                                                                                                                                                                                                                                                                                                                                                                                                                                    | H10407 derivative with isogenic deletion of <i>estP</i> and <i>estH</i>                                                            | This study                  |
| jf3038                                                                                                                                                                                                                                                                                                                                                                                                                                                                                                                                                                                    | deletion of <i>astA</i> in on the large p948 virulence plasmid of H10407; Km <sup>R</sup>                                          | this study                  |
| jf3081                                                                                                                                                                                                                                                                                                                                                                                                                                                                                                                                                                                    | jf2649 complemented with pQL231                                                                                                    | this study                  |
| JW5503-1                                                                                                                                                                                                                                                                                                                                                                                                                                                                                                                                                                                  | <i>E. coli</i> K-12 in-frame ΔtolC732:: Km <sup>R</sup>                                                                            | (30)                        |
| jf4652                                                                                                                                                                                                                                                                                                                                                                                                                                                                                                                                                                                    | H10407 derivative with tolC::Km <sup>R</sup> mutation                                                                              | this study                  |
| jf4709                                                                                                                                                                                                                                                                                                                                                                                                                                                                                                                                                                                    | jf4652 with pBAD/mycHisB                                                                                                           | this study                  |
| jf4712                                                                                                                                                                                                                                                                                                                                                                                                                                                                                                                                                                                    | jf4652 complemented with pYZ008                                                                                                    | this study                  |
| jf4644                                                                                                                                                                                                                                                                                                                                                                                                                                                                                                                                                                                    | jf2847 with pFLAG-CTC, Cm <sup>R</sup> Km <sup>R</sup> Amp <sup>R</sup>                                                            | this study                  |
| jf4648                                                                                                                                                                                                                                                                                                                                                                                                                                                                                                                                                                                    | jf2847 with pFLAG-STh, Cm <sup>R</sup> Km <sup>R</sup> Amp <sup>R</sup>                                                            | this study                  |
| jf4651                                                                                                                                                                                                                                                                                                                                                                                                                                                                                                                                                                                    | jf2847 with pSTh-FLAG, Cm <sup>R</sup> Km <sup>R</sup> Amp <sup>R</sup>                                                            | this study                  |
| AAEC191A                                                                                                                                                                                                                                                                                                                                                                                                                                                                                                                                                                                  | afimbriate <i>E. coli</i> K-12 derivative                                                                                          | (33)                        |
| <b>Plasmids</b>                                                                                                                                                                                                                                                                                                                                                                                                                                                                                                                                                                           |                                                                                                                                    |                             |
| pBAD/mycHisA                                                                                                                                                                                                                                                                                                                                                                                                                                                                                                                                                                              | pBR322ori; PBAD; Amp <sup>R</sup> ; <i>araC</i> ; C-terminal myc epitope tag. Arabinose inducible expression plasmid               | Invitrogen                  |
| pBAD/mycHisB                                                                                                                                                                                                                                                                                                                                                                                                                                                                                                                                                                              | pBR322ori; PBAD; Amp <sup>R</sup> ; <i>araC</i> ; C-terminal myc epitope tag. Arabinose inducible expression plasmid               | Invitrogen                  |
| pKD13                                                                                                                                                                                                                                                                                                                                                                                                                                                                                                                                                                                     | oriRSKγ Tn5 neomycin phosphotransferase (Km <sup>R</sup> ), FRT, β-lactamase (Amp <sup>R</sup> )                                   | (28)                        |
| pKD46                                                                                                                                                                                                                                                                                                                                                                                                                                                                                                                                                                                     | lambda red recombinase helper plasmid                                                                                              | (28)                        |
| pSMD002                                                                                                                                                                                                                                                                                                                                                                                                                                                                                                                                                                                   | <i>estP</i> cloned into <i>XhoI</i> site of pBAD/myc-HisA in frame with myc-His tags                                               | this study                  |
| pACYC184                                                                                                                                                                                                                                                                                                                                                                                                                                                                                                                                                                                  | p15Aori, Cm <sup>R</sup> , Tc <sup>R</sup>                                                                                         | (54)                        |
| pSMD001                                                                                                                                                                                                                                                                                                                                                                                                                                                                                                                                                                                   | <i>estH</i> cloned into <i>EcoRV</i> site of pACYC184                                                                              | this study                  |
| pGPS4                                                                                                                                                                                                                                                                                                                                                                                                                                                                                                                                                                                     | oriRSKγ Cm <sup>R</sup> , Tc <sup>R</sup>                                                                                          | NEB                         |
| pETDuet-1                                                                                                                                                                                                                                                                                                                                                                                                                                                                                                                                                                                 | pBR322ori; <i>lacI</i> ; Amp <sup>R</sup> ; IPTG inducible expression plasmid                                                      | Novagen                     |
| pQL230                                                                                                                                                                                                                                                                                                                                                                                                                                                                                                                                                                                    | <i>estP</i> cloned into <i>BglII</i> & <i>XhoI</i> sites of pETDeut-1                                                              |                             |
| pQL231                                                                                                                                                                                                                                                                                                                                                                                                                                                                                                                                                                                    | <i>estH</i> cloned into <i>NcoI</i> & <i>EcoRI</i> sites of pETDeut-1                                                              |                             |
| pQL238                                                                                                                                                                                                                                                                                                                                                                                                                                                                                                                                                                                    | <i>estP</i> cloned into <i>BglII</i> & <i>XhoI</i> sites and <i>estH</i> cloned into <i>NcoI</i> & <i>EcoRI</i> sites of pETDeut-1 |                             |
| pGEX-4T1                                                                                                                                                                                                                                                                                                                                                                                                                                                                                                                                                                                  | <i>lacI</i> <sup>f</sup> , Amp <sup>R</sup> ; expression plasmid for N-terminal GST fusions                                        | GE Healthcare Life Sciences |
| pCW002 <sup>a</sup>                                                                                                                                                                                                                                                                                                                                                                                                                                                                                                                                                                       | 5047 bp GST-STh expression plasmid, Amp <sup>R</sup>                                                                               | this study                  |
| pCW003 <sup>b</sup>                                                                                                                                                                                                                                                                                                                                                                                                                                                                                                                                                                       | <i>estP</i> cloned into <i>BamHI</i> & <i>EcoRI</i> sites of pGEX                                                                  | this study                  |
| pYZ011 <sup>c</sup>                                                                                                                                                                                                                                                                                                                                                                                                                                                                                                                                                                       | 5047 bp GST-mSTh expression plasmid for mSTh (A14Q), Amp <sup>R</sup>                                                              | this study                  |
| pYZ008                                                                                                                                                                                                                                                                                                                                                                                                                                                                                                                                                                                    | H10407 <i>tolC</i> cloned into pBAD/mycHisB                                                                                        | this study                  |
| pFLAG-CTC                                                                                                                                                                                                                                                                                                                                                                                                                                                                                                                                                                                 | 5.3 Kb plasmid, expressing C-terminal FLAG fusion proteins, Amp <sup>R</sup>                                                       | Sigma                       |
| pFLAG <sup>3</sup> -STh                                                                                                                                                                                                                                                                                                                                                                                                                                                                                                                                                                   | 5609 bp Flag-Pro-STh expression plasmid, Amp <sup>R</sup>                                                                          | this study                  |
| pSTh-FLAG <sup>3</sup>                                                                                                                                                                                                                                                                                                                                                                                                                                                                                                                                                                    | 5612 bp Pro-STh-Flag expression plasmid, Amp <sup>R</sup>                                                                          | this study                  |
| Km <sup>R</sup> :kanamycin resistance; Tc <sup>R</sup> : tetracycline resistance; Cm <sup>R</sup> : chloramphenicol resistance; Amp <sup>R</sup> :ampicillin resistance; NEB: New England Biolabs;<br><sup>a</sup> addgene accession number 90225: <a href="https://www.addgene.org/90225/">https://www.addgene.org/90225/</a><br><sup>b</sup> addgene accession number 90226: <a href="https://www.addgene.org/90226/">https://www.addgene.org/90226/</a><br><sup>c</sup> addgene accession number 110570: <a href="https://www.addgene.org/110570/">https://www.addgene.org/110570/</a> |                                                                                                                                    |                             |

473  
474

**Table 2: primers used in these studies**

| Primer     | Sequence (5'-3')                                         | Description                                                   |
|------------|----------------------------------------------------------|---------------------------------------------------------------|
| jf070212.1 | ATGAAAAAATCAATATTATTTTCTTTCTGTAG<br>TGTAGGCTGGAGCTGCTTCG | Forward primer for amplifying <i>estH</i> flanking from pKD13 |
| jf070212.2 | TTAATAGCACCCGGTACAAGCAGGATTACAACACA                      | Reverse primer for amplifying <i>estH</i> flanking from       |

|             |                                                                                                |                                                                                |
|-------------|------------------------------------------------------------------------------------------------|--------------------------------------------------------------------------------|
|             | AATCCGGGGATCCGTCGACC                                                                           | pKD13                                                                          |
| jfo70212.3  | ATGAAAAAGCTAATGTTGGCAATTTTTATTCTGTA<br>GTGTAGGCTGGAGCTGCTTC                                    | Forward primer for amplifying estP flanking from pKD13                         |
| jfo70212.4  | TTAATAACATCCAGCACAGGCAGGATTACAACAAA<br>GATCCGGGGATCCGTCGACC                                    | Reverse primer for amplifying estP flanking from pKD13                         |
| jfo71612.1  | GGCGCACACAATATAAAG                                                                             | 368 bp amplicon in H10407-estH downstream primer                               |
| jfo71612.2  | AGCGGAGAGTATAGTATGA                                                                            | estH Upstream                                                                  |
| jfo71612.3  | AAAACCAGATAGCCAGAC                                                                             | 168bp upstream from estP on H10407 plasmid p666                                |
| k2          | CGG TGC CCT GAA TGA ACT GC                                                                     | primer binding Km <sup>R</sup> cassette for confirming estP and tolC deletion  |
| jfo72312.1  | ATGAAAAATCAATATTATTTTTCTTCTGTAC<br>CCTGTTATCCCTAGATT                                           | Forward primer for amplifying estH from pGPS4                                  |
| jfo72312.2  | TTAATAGCACCCGGTACAAGCAGGATTACAACACA<br>ATAACGGTCTAAGGTAGC                                      | Reverse primer for amplifying estH from pGPS4                                  |
| jfo72412.3  | TGGATCCGAGCTCGAGATGAAAAAGCTAATGTTG                                                             | pBAD_Myc-hisA_XHOI_ST-P Forward primer for in-fusion cloning                   |
| jfo60614.1  | AGTGCAGATCTCGAG TTAATAACATCCAGCACA                                                             | for ST-P cloning to pBAD/mycHisA, pair to jfo72412.3                           |
| jfo72412.5  | GGCCTCTGCGGGATATCTAAATGAAAAAATCAATA<br>TTA                                                     | pACYC184_ECORV_TAA_ST-H forward primer for in-fusion cloning                   |
| jfo72412.6  | GTCGGAATGGACGATATCTTAATAGCACCCGGTAC<br>A                                                       | pACYC184_ECORV_TAA_ST-H reverse primer for in-fusion cloning                   |
| jfo60614.2  | AGGAGATATACCATGGATGAAAAAATCAATATTA                                                             | forward primer for ST-H in NcoI&EcoRI sites on pETDuet-1 vector                |
| jfo60614.3  | CGCCGAGCTCGAATCTTAATAGCACCCGGTACA                                                              | reverse primer for ST-H in NcoI&EcoRI sites on pETDuet-1 vector                |
| jfo60614.4  | TACATATGGCAGATCTATGAAAAAGCTAATGTTG                                                             | forward primer for ST-P in BglII&XhoI sites on pETDuet-1 vector                |
| jfo60614.5  | CTTACCAGACTCGAGTTAATAACATCCAGCACA                                                              | reverse primer for ST-P in BglII&XhoI sites on pETDuet-1 vector                |
| jfo42715.1  | GATCCGATCCCCGGGTACCGAGCTCGAATAGTAGC<br>AATTACTGCTGTGAATTGTGTTGTAATCCTGCTTGT<br>ACCGGGTGTATTGAG | 5' Mature estH gene with BamHI, linker, gene, stop codon                       |
| jfo42715.2  | AATTCTCAATAGCACCCGGTACAAGCAGGATTACAA<br>CACAATTCACAGCAGTAATTGCTACTATTGAGCTC<br>GGTACCCGGGGATCG | 3' Mature estH gene with Linker, gene, stop codon, EcoRI                       |
| jfo42517.1  | GATCCGATCCCCGGGTACCGAGCTCGAATAGTAGC<br>AATTACTGCTGTGAATTGTGTTGTAATCCTcaatGTA<br>CCGGGTGTATTGAG | 5' mutant estH gene with BamHI, linker, gene, stop codon                       |
| jfo42517.2  | AATTCTCAATAGCACCCGGTACAttgAGGATTACAAC<br>ACAATTCACAGCAGTAATTGCTACTATTGAGCTCG<br>GTACCCGGGGATCG | 3' mutant estH gene with Linker, gene, stop codon, EcoRI                       |
| jfo31915.5  | GATCCGATCCCCGGGTACCGAGCTCGAACACATTTT<br>ACTGCTGTGAACCTTTGTTGTAATCCTGCCTGTGCTG<br>GATGTTATTGAG  | 5' Mature estP gene with BamHI, linker, gene                                   |
| jfo31915.6  | AATTCTCAATAACATCCAGCACAGGCAGGATTACAA<br>CAAAGTTCACAGCAGTAAATGTGTTCCGAGCTCGG<br>TACCCGGGGATCG   | 3' Mature estP gene with Linker, gene, EcoRI                                   |
| jfo21915.1  | CGCTTACAGACAAGCTGTG                                                                            | Reverse sequencing primer that binds 70 bp downstream of the pGEX cloning site |
| jfo21915.2  | CCAGCAAGTATATAGCATGG                                                                           | Forward sequencing primer that binds 117 bp upstream of pGEX cloning site      |
| jf110716.38 | CGGGCGCAGTCTGTTCTATTG                                                                          | Forward primer for amplifying 1027 bp left flank segment of H10407 tolC        |
| jf110716.43 | TCATTTGCATTCTTGTGGTGAAGCAGTATTTAGCG<br>C                                                       | Reverse primer for amplifying 1027 bp left flank segment of H10407 tolC        |
| jf110716.44 | AAAGGGTTATGTGTAGGCTGGAGCTGCTTCG                                                                | Reverse primer for amplifying Km <sup>R</sup> cassette from strain JQ5503-1    |
| jf110716.45 | CTTACCACAAGGAATGCAATGATTCCGGGGATCC                                                             | Forward primer for amplifying Km <sup>R</sup> cassette from strain JQ5503-1    |
| jf110716.39 | CTTTTCAACCTGGGCGAGGG                                                                           | Reverse primer for amplifying 985 bp right flank segment of H10407 tolC        |
| jf110716.46 | CCTACACATAACCCTTCCGTAAGTATGACGACGA                                                             | Forward primer for amplifying 985 bp right flank                               |



|             |                                                                 |                                                                                                           |
|-------------|-----------------------------------------------------------------|-----------------------------------------------------------------------------------------------------------|
|             | CGGGGCTTCGG                                                     | segment of H10407 <i>tolC</i>                                                                             |
| jf101716.21 | CGATCGTGATGCTGCCTTTG                                            | 603 bp amplicon in H10407- <i>tolC</i> forward primer                                                     |
| jf101716.22 | AGCGACAGGTTGCGTTTTTC                                            | 603 bp amplicon in H10407- <i>tolC</i> downstream primer                                                  |
| jf112016.50 | ATTTGCCATTGCTCACCAATAAAC                                        | forward primer binding 2 kb upstream of H10407 <i>tolC</i>                                                |
| jf112016.51 | CTTGCAGACTGTAAACTGGTCG                                          | reverse primer binding 2 kb downstream of H10407 <i>tolC</i>                                              |
| jf120716.52 | GAACAAAACTCATCTCAGAAAGAGGATCTGAATAGCG                           | Forward primer to amplify 4036 bp of pBAD/myc-His B                                                       |
| jf120716.53 | GGTTAATTCCTCTGTAGCCCAAAAAACGG                                   | Reverse primer to amplify 4036 bp of pBAD/myc-His B                                                       |
| jf120716.59 | GGCTAACAGGAGGAATTAACCATGCAATGAAGAAATTGCTCCCCATTCT               | Forward primer H10407 <i>tolC</i> gene                                                                    |
| jf120716.60 | CTCTTCTGAGATGAGTTTTTGTCTCAGTTACGGAAAGGGTTATGACCGTTACT           | Reverse primer H10407 <i>tolC</i> gene                                                                    |
| jf092616.1  | <u>TTTCACCTTTCGCTCAGGATTACAAAGACCAC</u>                         | forward bp 44-60 of <i>estH</i> -5'3XFLAG                                                                 |
| jf092616.2  | <u>GAAGACCCTGCTGGTTTAGCCTTGTCATCGTC</u>                         | reverse bp 83-64 of <i>estH</i> -3'3XFLAG                                                                 |
| jf092616.3  | GCTAAACCAGCAGGGTCTTCAAAGAAAAAATTACA                             | Forward primer bp 64-99 of <i>estH</i>                                                                    |
| jf092616.4  | ATCCTGAGCGAAAGGTGAAAAAGATAATACAGAAAGA                           | reverse primer bp 63-27 of <i>estH</i>                                                                    |
| jf092616.5  | <u>CTGCTTGTACCGGGTCTATGATTACAAAGAC</u>                          | Forward primer bp 197-216 of <i>estH</i> -5'3XFLAG                                                        |
| jf092616.8  | ATAGCACCCGGTACAAGCAGGATTACA                                     | Reverse primer representing bp 216-190 of <i>estH</i>                                                     |
| jf092616.9  | GATTACAAAGACCACGATGGTGACTATAAAGACCATGATATCG                     | bp 1-43 and 66 through 19 of the 3X FLAG encoding sequence.                                               |
| jf092616.10 | CTTGTATCGTCGCTTTATAATCGATATCATGGTCTTTATAGTCACC                  |                                                                                                           |
| jf101916.31 | CAGATCTGGTACCCGGGAATTCT                                         | For amplifying pFLAG-CTC vector backbone                                                                  |
| jf101916.32 | TGAAGATCGATCTCTCGATCGAGTGA                                      |                                                                                                           |
| jf101916.33 | <u>ATTCGCGGGTACCAGATCTGATGAAAAATCAATATATTTATTTTTCTTTCTGTATT</u> | forward primer beginning with pFLAG-CTC-sequence followed by ( <i>estH</i> sequence bp 1-38)              |
| jf101916.34 | <u>GATCGAGAGATCGATCTTTCATTAATAGCACCCGGTACAAGCAGG</u>            | reverse primer beginning with pFLAG-CTC sequence followed by 3'estH native reverse sequence (bp 219-196). |
| jf101916.35 | <u>GATCGAGAGATCGATCTTTCATTACTTGTATCGTCGTCTTTATAATCGATATCATG</u> | reverse primer beginning with pFLAG-CTC-sequence followed by bases 69-34 of the 3xFLAG sequence.          |
| jf092313.5  | TCTTTCCCCTCTTTAGTCAG                                            | <i>estP</i> RT-PCR forward primer                                                                         |
| jf092313.6  | ACAGGCAGGATTACAACAAG                                            | <i>estP</i> RT-PCR reverse primer                                                                         |
| jf092313.7  | TACAAGCAGGATTACAACAC                                            | <i>estH</i> RT-PCR forward primer                                                                         |
| jf092313.8  | AGTGGTCTGAAAGCATG                                               | <i>estH</i> RT-PCR reverse primer                                                                         |
| jf092210.1  | ATCAATCTGCCGGTAAGAACGGT                                         | <i>arcA</i> RT-PCR forward primer                                                                         |
| jf092210.2  | TCCAGATCACCGCAGAAGCGATAA                                        | <i>arcA</i> RT-PCR reverse primer                                                                         |

475

476

477  
478  
479  
480  
481  
482  
483  
484  
485  
486  
487  
488  
489  
490  
491  
492  
493  
494  
495  
496  
497  
498  
499  
500  
501  
502  
503  
504  
505  
506  
507  
508  
509  
510  
511  
512  
513  
514  
515  
516  
517  
518  
519  
520  
521  
522  
523  
524  
525  
526  
527  
528  
529  
530  
531  
532  
533

## references

1. **Kotloff, K. L., J. P. Nataro, W. C. Blackwelder, D. Nasrin, T. H. Farag, S. Panchalingam, Y. Wu, S. O. Sow, D. Sur, R. F. Breiman, A. S. Faruque, A. K. Zaidi, D. Saha, P. L. Alonso, B. Tamboura, D. Sanogo, U. Onwuchekwa, B. Manna, T. Ramamurthy, S. Kanungo, J. B. Ochieng, R. Omore, J. O. Oundo, A. Hossain, S. K. Das, S. Ahmed, S. Qureshi, F. Quadri, R. A. Adegbola, M. Antonio, M. J. Hossain, A. Akinsola, I. Mandomando, T. Nhampossa, S. Acacio, K. Biswas, C. E. O'Reilly, E. D. Mintz, L. Y. Berkeley, K. Muhsen, H. Sommerfelt, R. M. Robins-Browne, and M. M. Levine.** 2013. Burden and aetiology of diarrhoeal disease in infants and young children in developing countries (the Global Enteric Multicenter Study, GEMS): a prospective, case-control study. *Lancet*.
2. **Hameed, J. M., R. L. McCaffrey, A. McCoy, T. Brannock, G. J. Martin, W. T. Scouten, K. Brooks, S. D. Putnam, and M. S. Riddle.** 2016. Incidence, Etiology and Risk Factors for Travelers' Diarrhea during a Hospital Ship-Based Military Humanitarian Mission: Continuing Promise 2011. *PLoS One* **11**:e0154830.
3. **Shah, N., H. L. DuPont, and D. J. Ramsey.** 2009. Global etiology of travelers' diarrhea: systematic review from 1973 to the present. *Am J Trop Med Hyg* **80**:609-614.
4. **Medus, C., J. M. Besser, B. A. Juni, B. Koziol, V. Lappi, K. E. Smith, and C. W. Hedberg.** 2016. Long-Term Sentinel Surveillance for Enterotoxigenic *Escherichia coli* and Non-O157 Shiga Toxin-Producing *E. coli* in Minnesota. *Open Forum Infect Dis* **3**:ofw003.
5. **Beatty, M. E., P. M. Adcock, S. W. Smith, K. Quinlan, L. A. Kamimoto, S. Y. Rowe, K. Scott, C. Conover, T. Varchmin, C. A. Bopp, K. D. Greene, B. Bibb, L. Slutsker, and E. D. Mintz.** 2006. Epidemic diarrhea due to enterotoxigenic *Escherichia coli*. *Clin Infect Dis* **42**:329-334.
6. **Devasia, R. A., T. F. Jones, J. Ward, L. Stafford, H. Hardin, C. Bopp, M. Beatty, E. Mintz, and W. Schaffner.** 2006. Endemically acquired foodborne outbreak of enterotoxin-producing *Escherichia coli* serotype O169:H41. *Am J Med* **119**:168 e167-110.
7. **Jain, S., L. Chen, A. Dechet, A. T. Hertz, D. L. Brus, K. Hanley, B. Wilson, J. Frank, K. D. Greene, M. Parsons, C. A. Bopp, R. Todd, M. Hoekstra, E. D. Mintz, and P. K. Ram.** 2008. An outbreak of enterotoxigenic *Escherichia coli* associated with sushi restaurants in Nevada, 2004. *Clin Infect Dis* **47**:1-7.
8. **Beatty, M. E., C. A. Bopp, J. G. Wells, K. D. Greene, N. D. Puhr, and E. D. Mintz.** 2004. Enterotoxin-producing *Escherichia coli* O169:H41, United States. *Emerg Infect Dis* **10**:518-521.
9. **Sack, R. B., S. L. Gorbach, J. G. Banwell, B. Jacobs, B. D. Chatterjee, and R. C. Mitra.** 1971. Enterotoxigenic *Escherichia coli* isolated from patients with severe cholera-like disease. *J Infect Dis* **123**:378-385.
10. **Carpenter, C. C., D. Barua, C. K. Wallace, R. B. Sack, P. P. Mitra, A. S. Werner, T. P. Duffy, A. Oleinick, S. R. Khanra, and G. W. Lewis.** 1965. Clinical and physiological observations during an epidemic outbreak of non-vibrio cholera-like disease in Calcutta. *Bull World Health Organ* **33**:665-671.
11. **Vicente, A. C., L. F. Teixeira, L. Iniguez-Rojas, M. G. Luna, L. Silva, J. R. Andrade, and B. E. Guth.** 2005. Outbreaks of cholera-like diarrhoea caused by enterotoxigenic *Escherichia coli* in the Brazilian Amazon Rainforest. *Trans R Soc Trop Med Hyg* **99**:669-674.
12. **Guerrant, R. L., M. D. DeBoer, S. R. Moore, R. J. Scharf, and A. A. Lima.** 2013. The impoverished gut--a triple burden of diarrhoea, stunting and chronic disease. *Nat Rev Gastroenterol Hepatol* **10**:220-229.
13. **Sahl, J. W., H. Steinsland, J. C. Redman, S. V. Angiuoli, J. P. Nataro, H. Sommerfelt, and D. A. Rasko.** 2011. A comparative genomic analysis of diverse clonal types of enterotoxigenic *Escherichia coli* reveals pathovar-specific conservation. *Infect Immun* **79**:950-960.
14. **Wolf, M. K.** 1997. Occurrence, distribution, and associations of O and H serogroups, colonization factor antigens, and toxins of enterotoxigenic *Escherichia coli*. *Clin Microbiol Rev* **10**:569-584.
15. **Rasheed, J. K., L. M. Guzman-Verduzco, and Y. M. Kupersztoch.** 1990. Two precursors of the heat-stable enterotoxin of *Escherichia coli*: evidence of extracellular processing. *Mol Microbiol* **4**:265-273.
16. **Schulz, S., C. K. Green, P. S. Yuen, and D. L. Garbers.** 1990. Guanylyl cyclase is a heat-stable enterotoxin receptor. *Cell* **63**:941-948.
17. **Giannella, R. A., and E. A. Mann.** 2003. *E. coli* heat-stable enterotoxin and guanylyl cyclase C: new functions and unsuspected actions. *Trans Am Clin Climatol Assoc* **114**:67-85; discussion 85-66.
18. **Field, M., L. H. Graf, Jr., W. J. Laird, and P. L. Smith.** 1978. Heat-stable enterotoxin of *Escherichia coli*: in vitro effects on guanylate cyclase activity, cyclic GMP concentration, and ion transport in small intestine. *Proc Natl Acad Sci U S A* **75**:2800-2804.
19. **Zachos, N. C., M. Tse, and M. Donowitz.** 2005. Molecular physiology of intestinal Na<sup>+</sup>/H<sup>+</sup> exchange. *Annu Rev Physiol* **67**:411-443.
20. **Sack, D. A., M. H. Merson, J. G. Wells, R. B. Sack, and G. K. Morris.** 1975. Diarrhoea associated with heat-stable enterotoxin-producing strains of *Escherichia coli*. *Lancet* **2**:239-241.

- 534 21. **Ryder, R. W., I. K. Wachsmuth, A. E. Buxton, D. G. Evans, H. L. DuPont, E. Mason, and F. F. Barrett.** 1976. Infantile diarrhea produced by heat-stable enterotoxigenic *Escherichia coli*. *N Engl J Med* **295**:849-  
535 853.  
536
- 537 22. **Levine, M. M., E. S. Caplan, D. Waterman, R. A. Cash, R. B. Hornick, and M. J. Snyder.** 1977. Diarrhea  
538 caused by *Escherichia coli* that produce only heat-stable enterotoxin. *Infection and immunity* **17**:78-82.  
539 23. **Bolin, I., G. Wiklund, F. Qadri, O. Torres, A. L. Bourgeois, S. Savarino, and A. M. Svennerholm.** 2006.  
540 Enterotoxigenic *Escherichia coli* with ST<sub>H</sub> and ST<sub>P</sub> genotypes is associated with diarrhea both in children in  
541 areas of endemicity and in travelers. *J Clin Microbiol* **44**:3872-3877.  
542 24. **Taxt, A. M., Y. Diaz, R. Aasland, J. D. Clements, J. P. Nataro, H. Sommerfelt, and P. Puntervoll.** 2016.  
543 Towards Rational Design of a Toxoid Vaccine against the Heat-Stable Toxin of *Escherichia coli*. *Infect*  
544 *Immun* **84**:1239-1249.
- 545 25. **Moseley, S. L., M. Samadpour-Motalebi, and S. Falkow.** 1983. Plasmid association and nucleotide  
546 sequence relationships of two genes encoding heat-stable enterotoxin production in *Escherichia coli* H-  
547 10407. *J Bacteriol* **156**:441-443.  
548 26. **Yamamoto, T., and T. Yokota.** 1983. Plasmids of enterotoxigenic *Escherichia coli* H10407: evidence for  
549 two heat-stable enterotoxin genes and a conjugal transfer system. *J Bacteriol* **153**:1352-1360.  
550 27. **Crossman, L. C., R. R. Chaudhuri, S. A. Beatson, T. J. Wells, M. Desvaux, A. F. Cunningham, N. K.**  
551 **Petty, V. Mahon, C. Brinkley, J. L. Hobman, S. J. Savarino, S. M. Turner, M. J. Pallen, C. W. Penn, J.**  
552 **Parkhill, A. K. Turner, T. J. Johnson, N. R. Thomson, S. G. Smith, and I. R. Henderson.** 2010. A  
553 commensal gene bad: complete genome sequence of the prototypical enterotoxigenic *Escherichia coli*  
554 strain H10407. *Journal of bacteriology* **192**:5822-5831.
- 555 28. **Datsenko, K. A., and B. L. Wanner.** 2000. One-step inactivation of chromosomal genes in *Escherichia coli*  
556 K-12 using PCR products. *Proc Natl Acad Sci U S A* **97**:6640-6645.
- 557 29. **Rodas, C., V. Iniguez, F. Qadri, G. Wiklund, A. M. Svennerholm, and A. Sjoling.** 2009. Development of  
558 multiplex PCR assays for detection of enterotoxigenic *Escherichia coli* colonization factors and toxins. *J Clin*  
559 *Microbiol* **47**:1218-1220.
- 560 30. **Baba, T., T. Ara, M. Hasegawa, Y. Takai, Y. Okumura, M. Baba, K. A. Datsenko, M. Tomita, B. L.**  
561 **Wanner, and H. Mori.** 2006. Construction of *Escherichia coli* K-12 in-frame, single-gene knockout mutants:  
562 the Keio collection. *Molecular systems biology* **2**:2006 0008.
- 563 31. **Quan, J., and J. Tian.** 2009. Circular polymerase extension cloning of complex gene libraries and  
564 pathways. *PLoS One* **4**:e6441.
- 565 32. **Clements, J. D.** 1990. Construction of a nontoxic fusion peptide for immunization against *Escherichia coli*  
566 strains that produce heat-labile and heat-stable enterotoxins. *Infect Immun* **58**:1159-1166.
- 567 33. **Blomfield, I. C., M. S. McClain, and B. I. Eisenstein.** 1991. Type 1 fimbriae mutants of *Escherichia coli* K12:  
568 characterization of recognized afimbriate strains and construction of new fim deletion mutants. *Mol*  
569 *Microbiol* **5**:1439-1445.
- 570 34. **Savarino, S. J., A. Fasano, J. Watson, B. M. Martin, M. M. Levine, S. Guandalini, and P. Guerry.** 1993.  
571 Enteroaggregative *Escherichia coli* heat-stable enterotoxin 1 represents another subfamily of *E. coli* heat-  
572 stable toxin. *Proc Natl Acad Sci U S A* **90**:3093-3097.
- 573 35. **Yamamoto, T., and P. Echeverria.** 1996. Detection of the enteroaggregative *Escherichia coli* heat-stable  
574 enterotoxin 1 gene sequences in enterotoxigenic *E. coli* strains pathogenic for humans. *Infect Immun*  
575 **64**:1441-1445.
- 576 36. **McVeigh, A., A. Fasano, D. A. Scott, S. Jelacic, S. L. Moseley, D. C. Robertson, and S. J. Savarino.**  
577 2000. IS<sub>1414</sub>, an *Escherichia coli* insertion sequence with a heat-stable enterotoxin gene embedded in a  
578 transposase-like gene. *Infect Immun* **68**:5710-5715.
- 579 37. **Fleckenstein, J. M., K. Roy, J. F. Fischer, and M. Burkitt.** 2006. Identification of a two-partner secretion  
580 locus of enterotoxigenic *Escherichia coli*. *Infect Immun* **74**:2245-2258.
- 581 38. **Foreman, D. T., Y. Martinez, G. Coombs, A. Torres, and Y. M. Kupersztoch.** 1995. TolC and DsbA are  
582 needed for the secretion of ST<sub>B</sub>, a heat-stable enterotoxin of *Escherichia coli*. *Molecular microbiology*  
583 **18**:237-245.
- 584 39. **Yamanaka, H., T. Nomura, Y. Fujii, and K. Okamoto.** 1998. Need for TolC, an *Escherichia coli* outer  
585 membrane protein, in the secretion of heat-stable enterotoxin I across the outer membrane. *Microb*  
586 *Pathog* **25**:111-120.
- 587 40. **Weikel, C. S., K. M. Tiemens, S. L. Moseley, I. M. Huq, and R. L. Guerrant.** 1986. Species specificity and  
588 lack of production of ST<sub>B</sub> enterotoxin by *Escherichia coli* strains isolated from humans with diarrheal  
589 illness. *Infect Immun* **52**:323-325.
- 590 41. **Lortie, L. A., J. D. Dubreuil, and J. Harel.** 1991. Characterization of *Escherichia coli* strains producing  
591 heat-stable enterotoxin b (ST<sub>B</sub>) isolated from humans with diarrhea. *J Clin Microbiol* **29**:656-659.

- 592 42. **Dorsey, F. C., J. F. Fischer, and J. M. Fleckenstein.** 2006. Directed delivery of heat-labile enterotoxin by  
593 enterotoxigenic *Escherichia coli*. *Cell Microbiol* **8**:1516-1527.
- 594 43. **Luo, Q., F. Qadri, R. Kansal, D. A. Rasko, A. Sheikh, and J. M. Fleckenstein.** 2015. Conservation and  
595 immunogenicity of novel antigens in diverse isolates of enterotoxigenic *Escherichia coli*. *PLoS Negl Trop*  
596 *Dis* **9**:e0003446.
- 597 44. **Roy, K., D. J. Hamilton, and J. M. Fleckenstein.** 2012. Cooperative role of antibodies against heat-labile  
598 toxin and the EtpA Adhesin in preventing toxin delivery and intestinal colonization by enterotoxigenic  
599 *Escherichia coli*. *Clin Vaccine Immunol* **19**:1603-1608.
- 600 45. **Del Canto, F., P. Valenzuela, L. Cantero, J. Bronstein, J. E. Blanco, J. Blanco, V. Prado, M. Levine, J.**  
601 **Nataro, H. Sommerfelt, and R. Vidal.** 2011. Distribution of Classical and Nonclassical Virulence Genes in  
602 Enterotoxigenic *Escherichia coli* Isolates from Chilean Children and tRNA Gene Screening for Putative  
603 Insertion Sites for Genomic Islands. *J Clin Microbiol* **49**:3198-3203.
- 604 46. **Okamoto, K., and M. Takahara.** 1990. Synthesis of *Escherichia coli* heat-stable enterotoxin STp as a pre-  
605 pro form and role of the pro sequence in secretion. *J Bacteriol* **172**:5260-5265.
- 606 47. **Yang, Y., Z. Gao, L. M. Guzman-Verduzco, K. Tachias, and Y. M. Kupersztoch.** 1992. Secretion of the  
607 STA<sub>3</sub> heat-stable enterotoxin of *Escherichia coli*: extracellular delivery of Pro-STA is accomplished by  
608 either Pro or STA. *Mol Microbiol* **6**:3521-3529.
- 609 48. **Kotloff, K. L., J. P. Nataro, W. C. Blackwelder, D. Nasrin, T. H. Farag, S. Panchalingam, Y. Wu, S. O.**  
610 **Sow, D. Sur, R. F. Breiman, A. S. Faruque, A. K. Zaidi, D. Saha, P. L. Alonso, B. Tamboura, D. Sanogo,**  
611 **U. Onwuchekwa, B. Manna, T. Ramamurthy, S. Kanungo, J. B. Ochieng, R. Omoro, J. O. Oundo, A.**  
612 **Hossain, S. K. Das, S. Ahmed, S. Qureshi, F. Quadri, R. A. Adegbola, M. Antonio, M. J. Hossain, A.**  
613 **Akinsola, I. Mandomando, T. Nhampossa, S. Acacio, K. Biswas, C. E. O'Reilly, E. D. Mintz, L. Y.**  
614 **Berkeley, K. Muhsen, H. Sommerfelt, R. M. Robins-Browne, and M. M. Levine.** 2013. Burden and  
615 aetiology of diarrhoeal disease in infants and young children in developing countries (the Global Enteric  
616 Multicenter Study, GEMS): a prospective, case-control study. *Lancet* **382**:209-222.
- 617 49. **Sheikh, A., R. Rashu, Y. A. Begum, F. M. Kuhlman, M. A. Ciorba, S. J. Hultgren, F. Qadri, and J. M.**  
618 **Fleckenstein.** 2017. Highly conserved type 1 pili promote enterotoxigenic *E. coli* pathogen-host  
619 interactions. *PLoS Negl Trop Dis* **11**:e0005586.
- 620 50. **Bohnert, J. A., S. Schuster, W. V. Kern, T. Karcz, A. Olejarz, A. Kaczor, J. Handzlik, and K. Kiec-**  
621 **Kononowicz.** 2016. Novel Piperazine Arylideneimidazolones Inhibit the AcrAB-TolC Pump in *Escherichia*  
622 *coli* and Simultaneously Act as Fluorescent Membrane Probes in a Combined Real-Time Influx and Efflux  
623 Assay. *Antimicrob Agents Chemother* **60**:1974-1983.
- 624 51. **Mahamoud, A., J. Chevalier, S. Alibert-Franco, W. V. Kern, and J. M. Pages.** 2007. Antibiotic efflux  
625 pumps in Gram-negative bacteria: the inhibitor response strategy. *J Antimicrob Chemother* **59**:1223-1229.
- 626 52. **Koronakis, V., J. Eswaran, and C. Hughes.** 2004. Structure and function of TolC: the bacterial exit duct for  
627 proteins and drugs. *Annu Rev Biochem* **73**:467-489.
- 628 53. **Evans, D. J., Jr., and D. G. Evans.** 1973. Three characteristics associated with enterotoxigenic *Escherichia*  
629 *coli* isolated from man. *Infect Immun* **8**:322-328.
- 630 54. **Rose, R. E.** 1988. The nucleotide sequence of pACYC184. *Nucleic Acids Res* **16**:355.
- 631
- 632

633

634 **Acknowledgements**

635 These studies were supported in part by funds from the National Institute for Allergy and

636 Infectious Diseases (NIAID) grants R01AI89894, R01AI126887; and The Department of Veterans

637 Affairs ([5101BX001469-05](https://doi.org/10.1016/j.jid.2014.05.005)); CW was supported in part by a Washington University/HHMI

638 Summer Undergraduate Research Fellowship (HHMI SURF).

639

640

**A**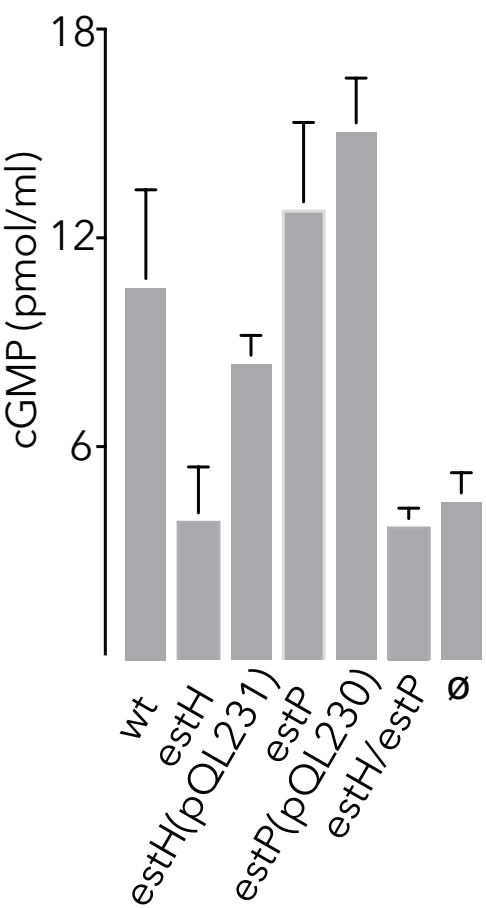**B**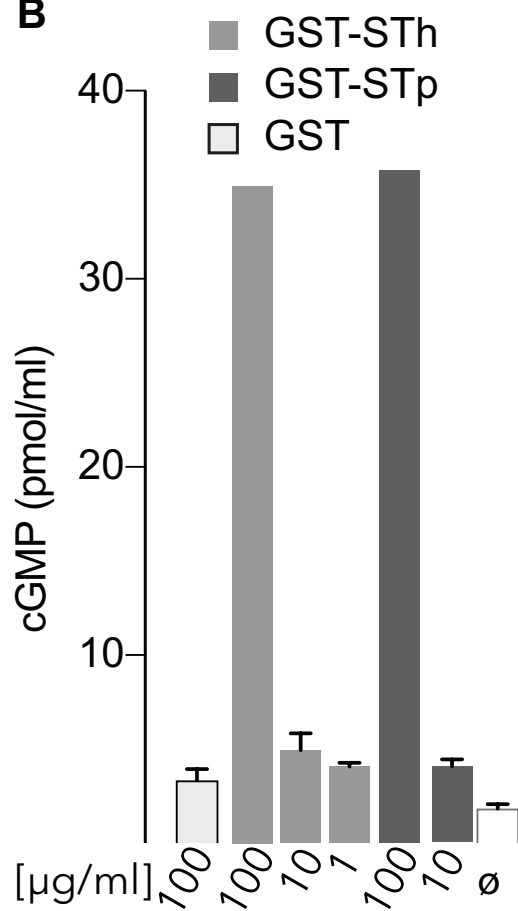**C**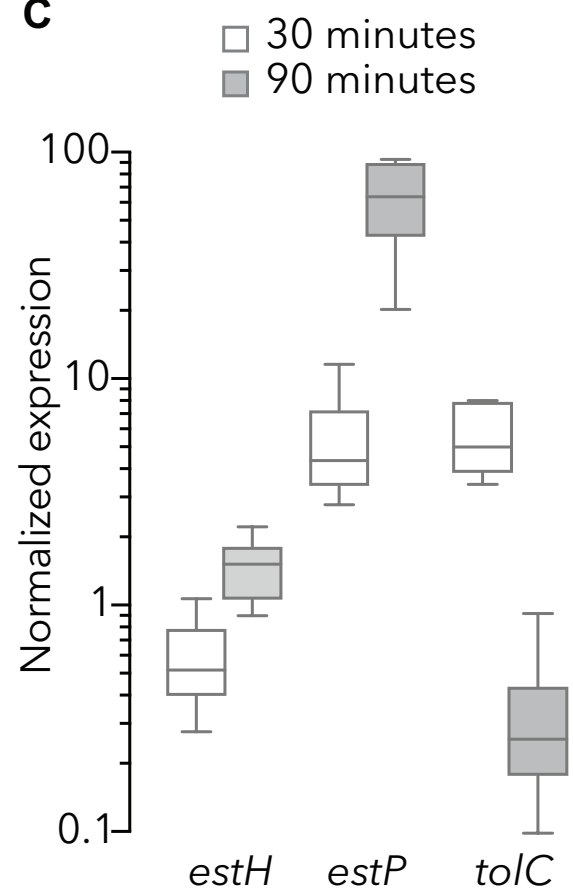**D**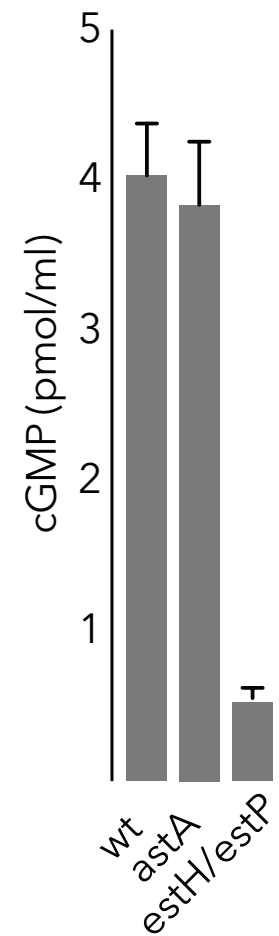

**A**

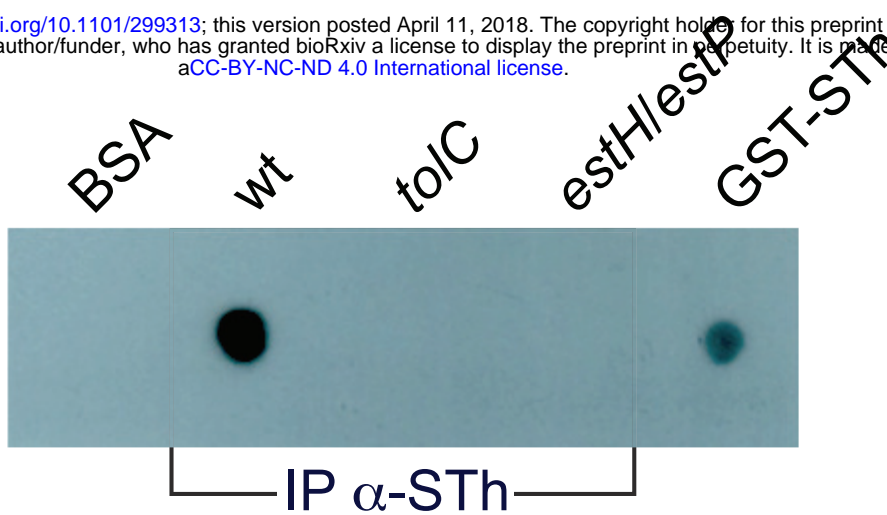

**B**

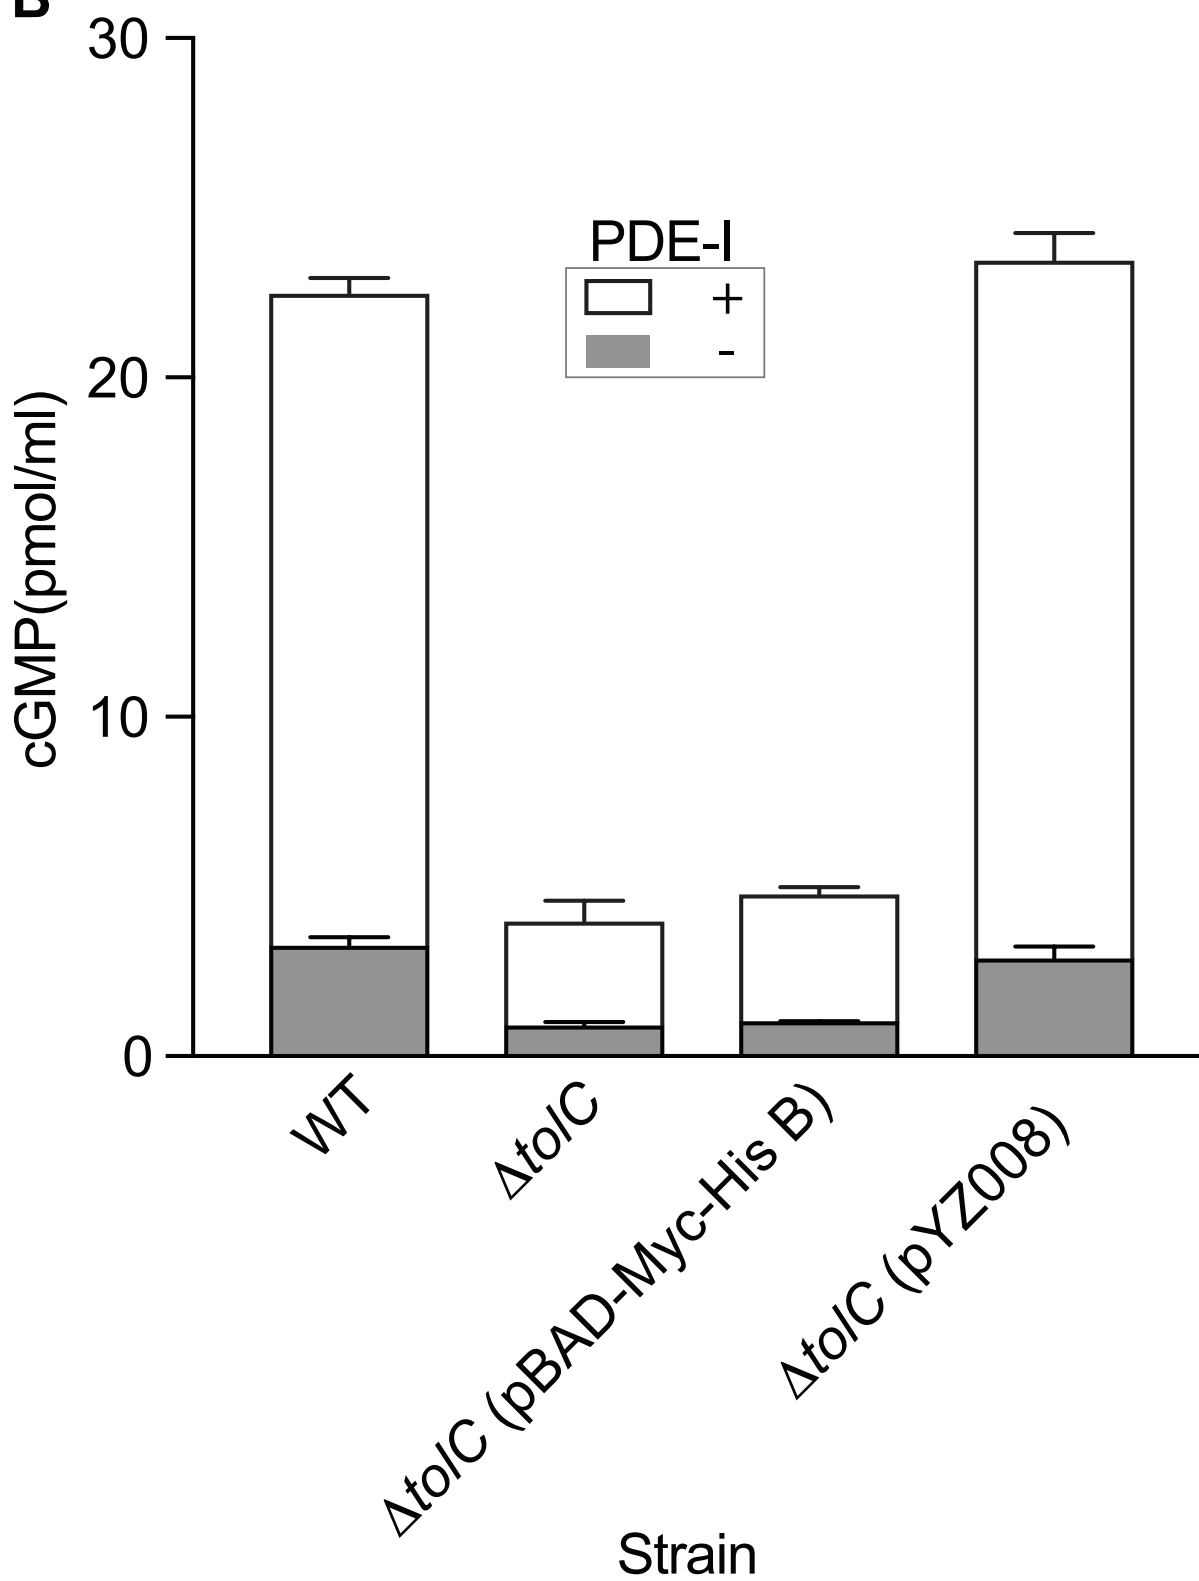

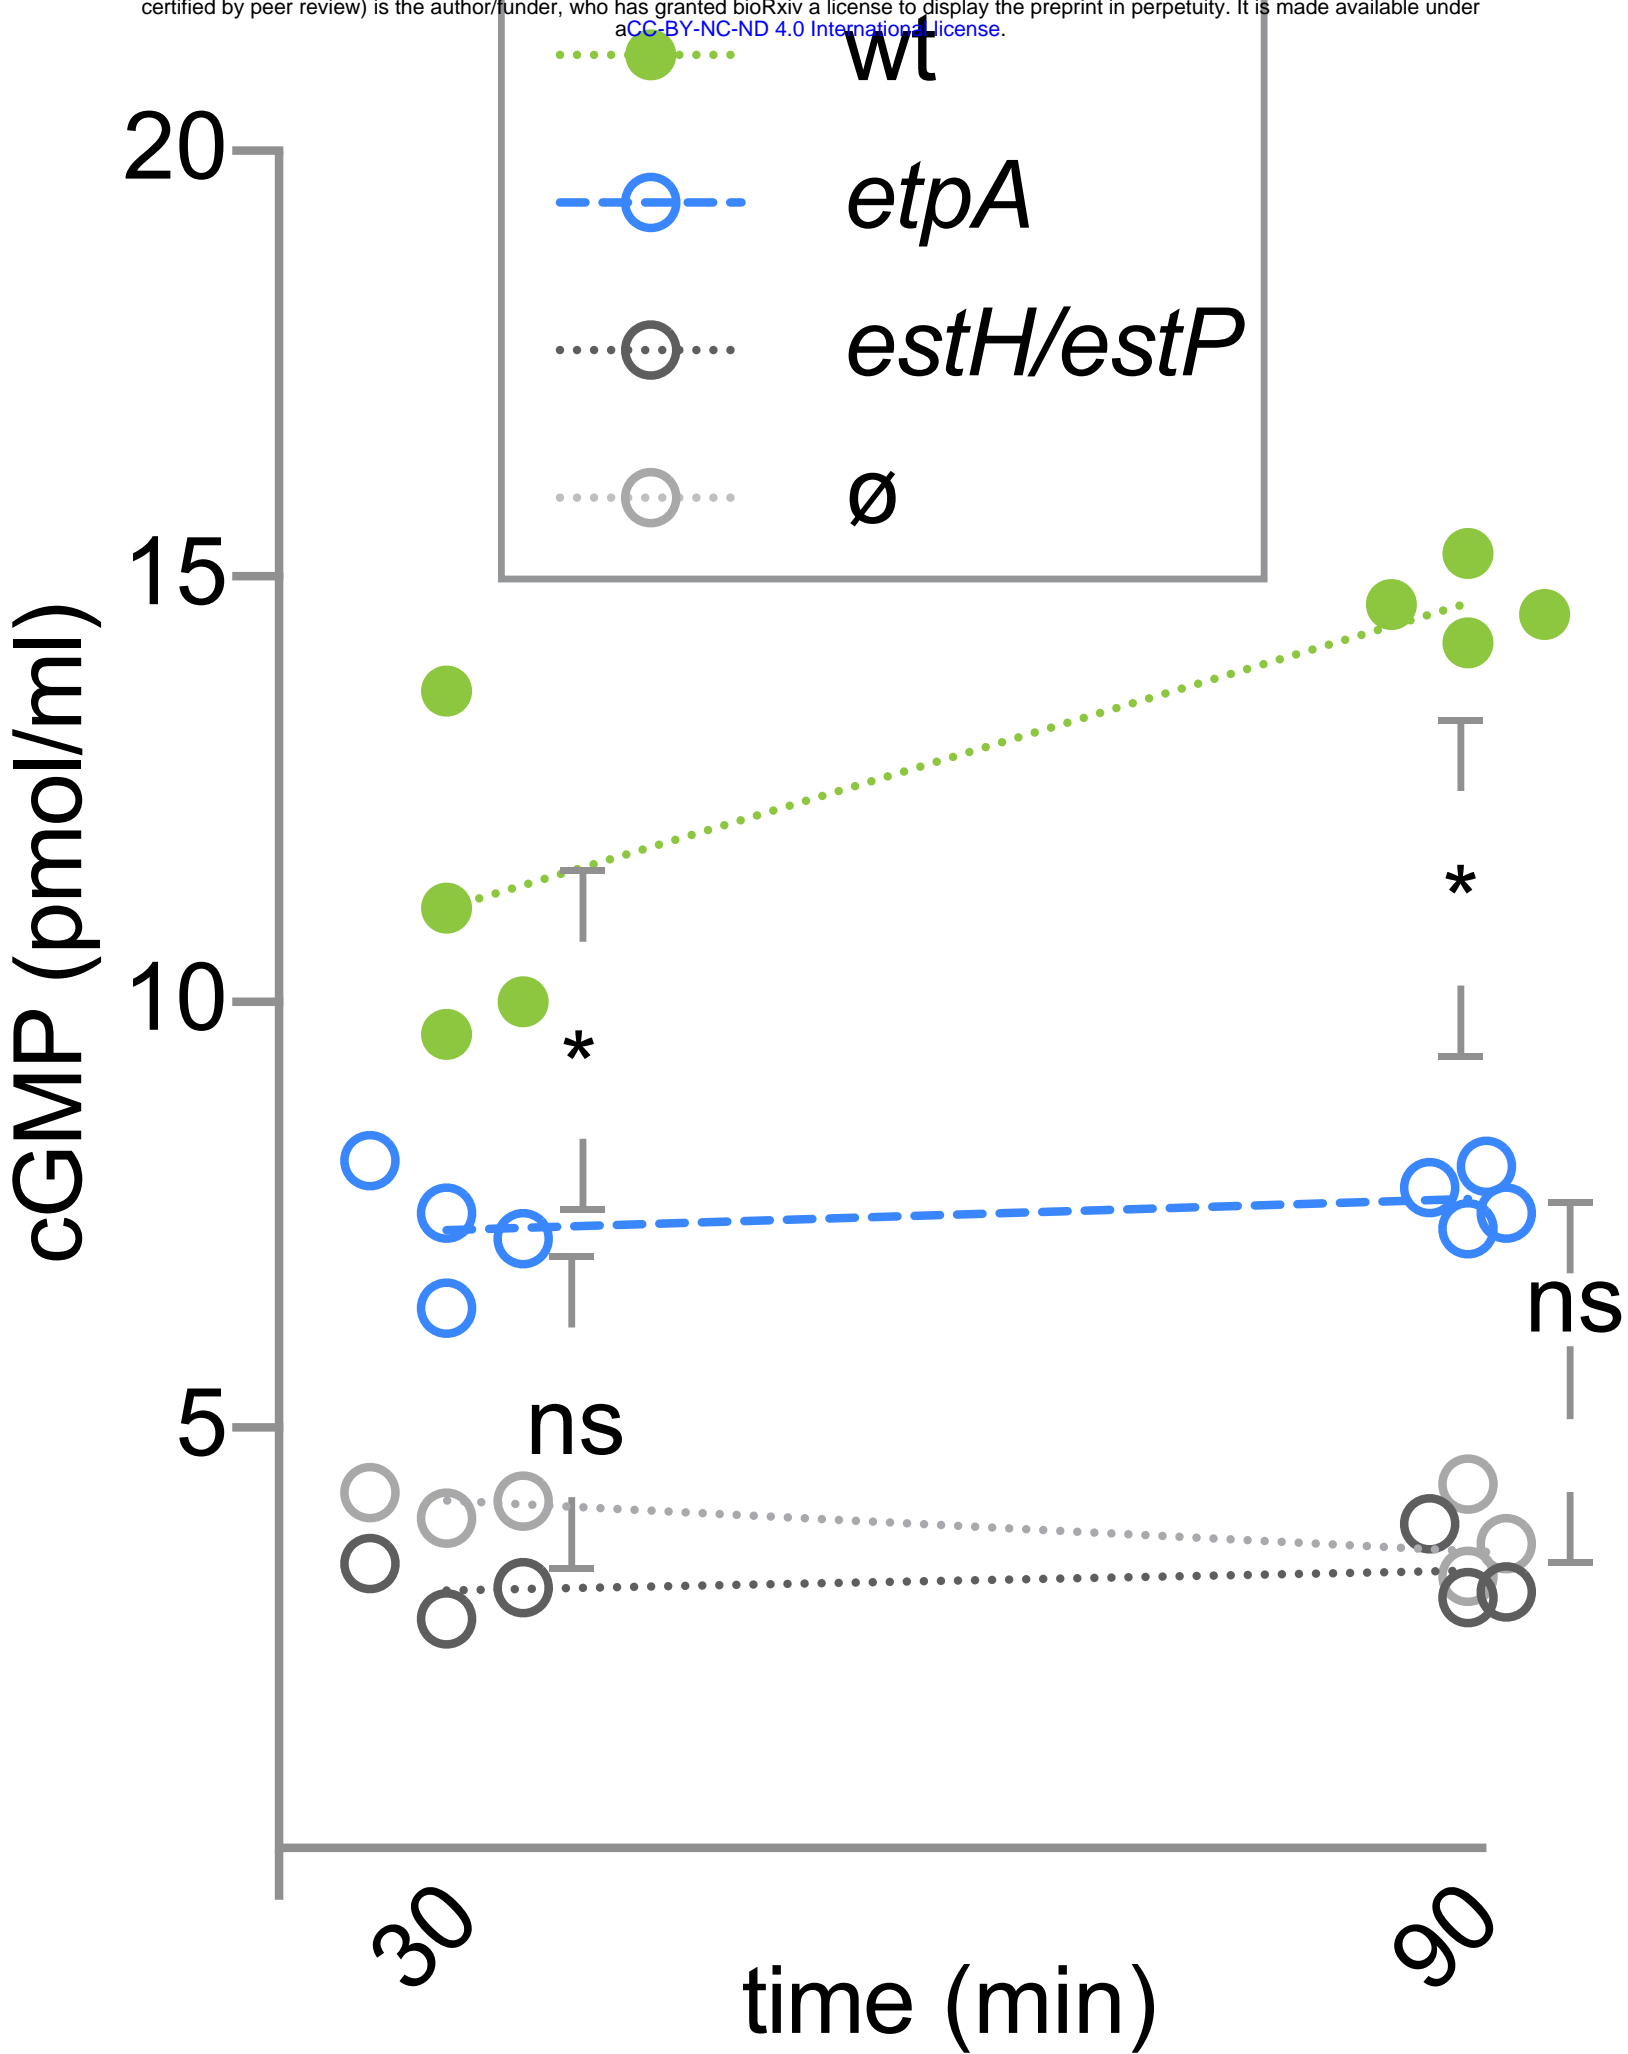



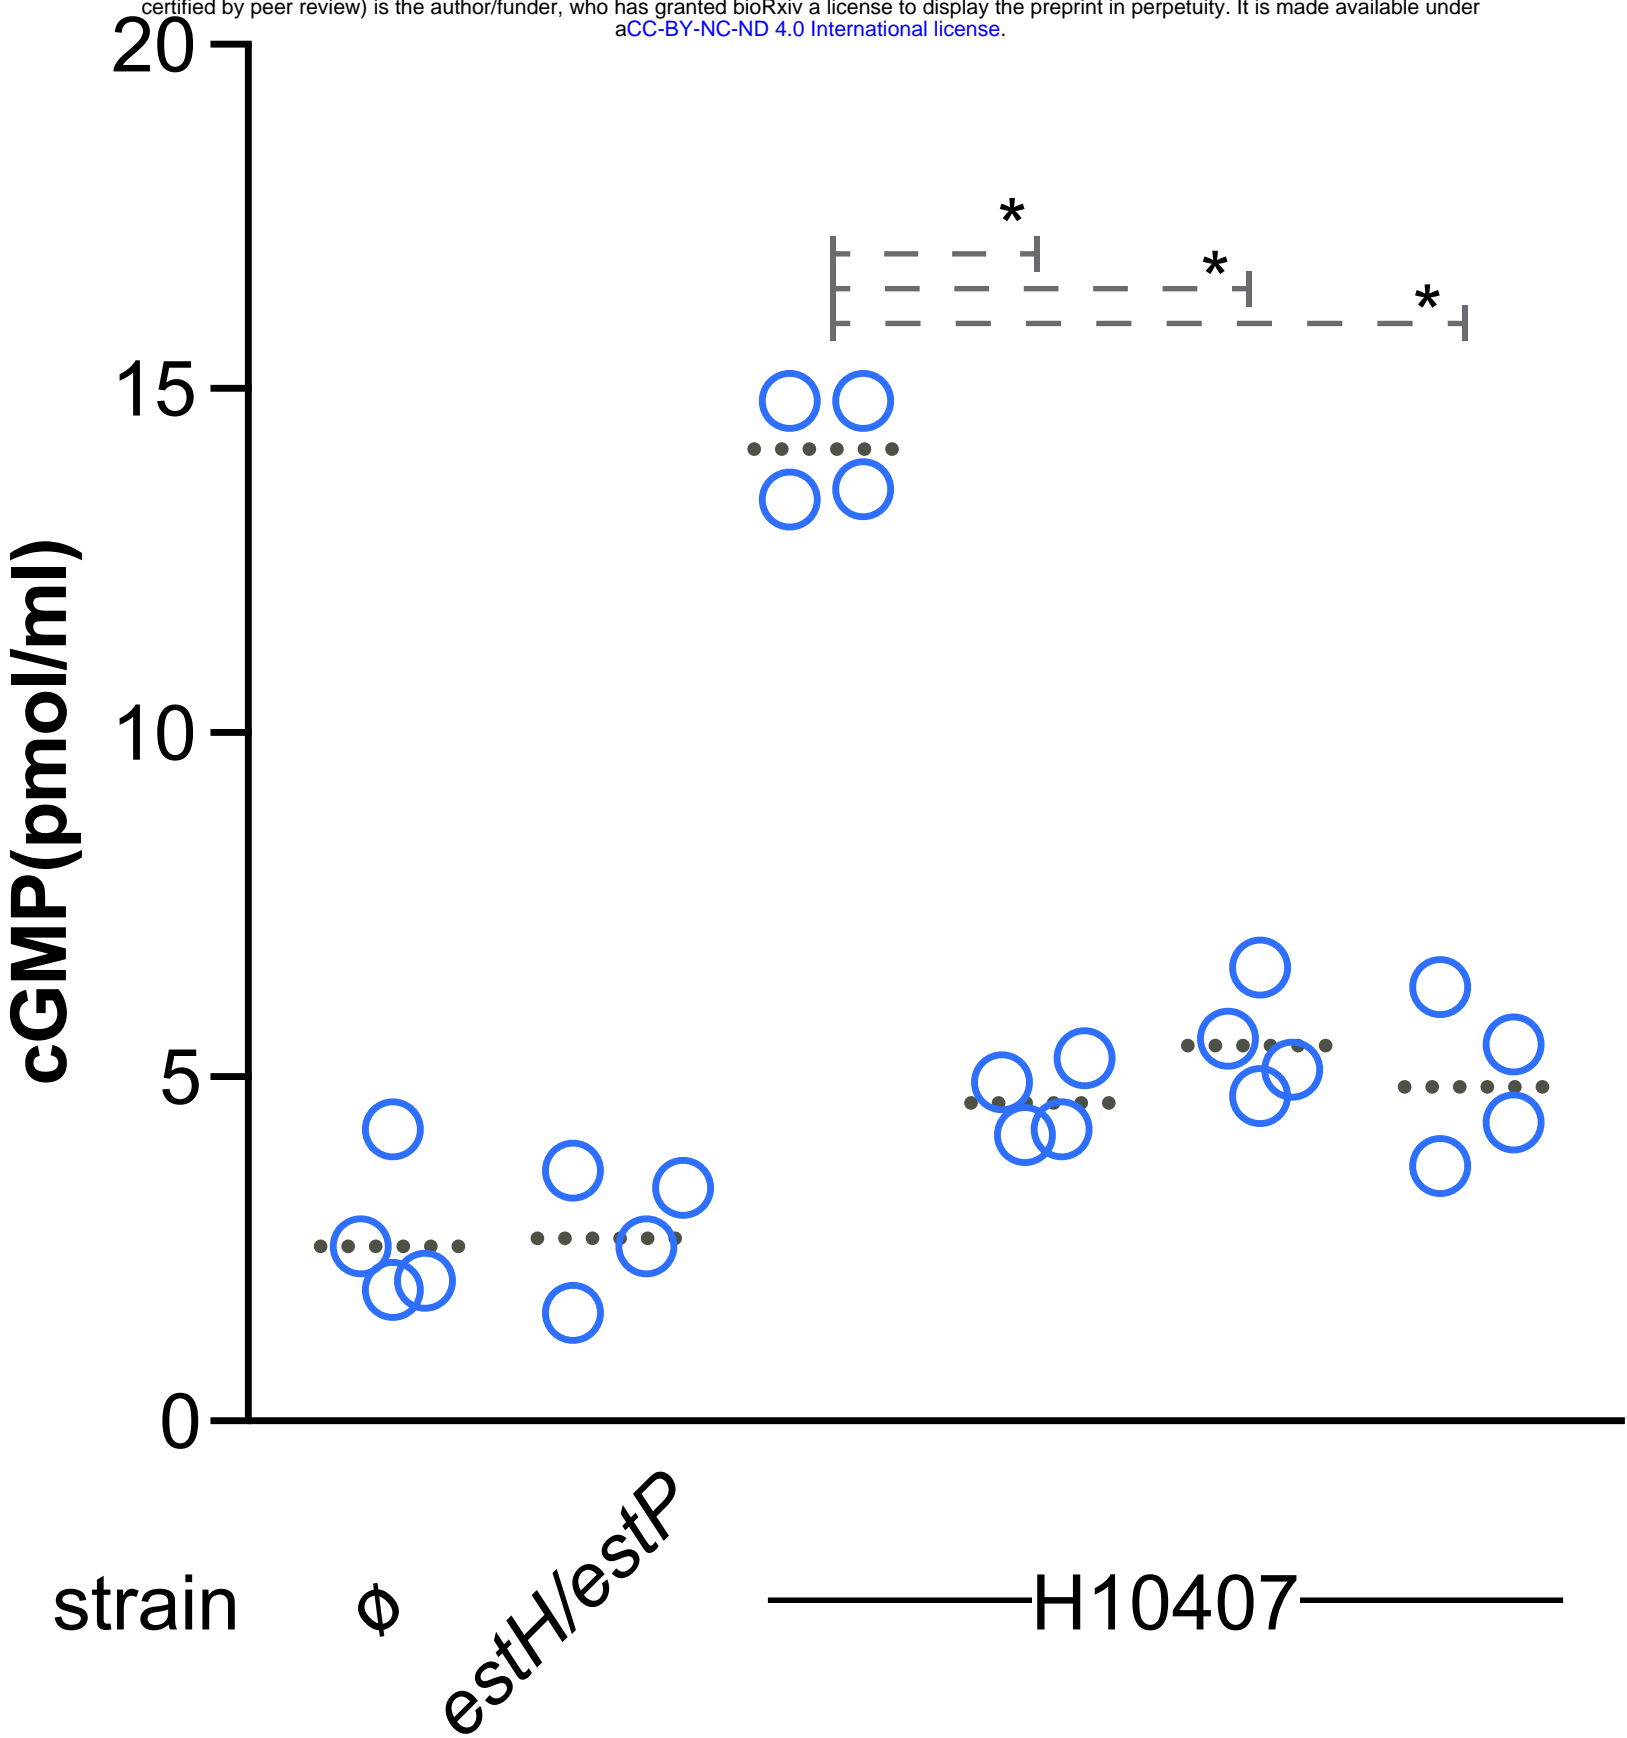

antibody

|               |   |   |   |   |   |   |
|---------------|---|---|---|---|---|---|
| $\alpha$ STh  | - | - | - | + | - | + |
| $\alpha$ EtpA | - | - | - | - | + | + |

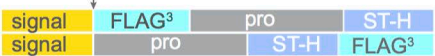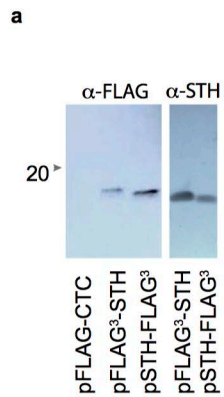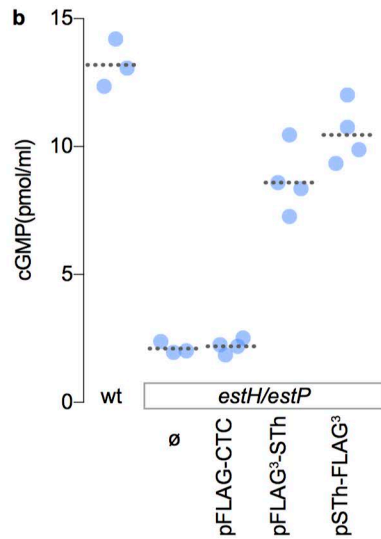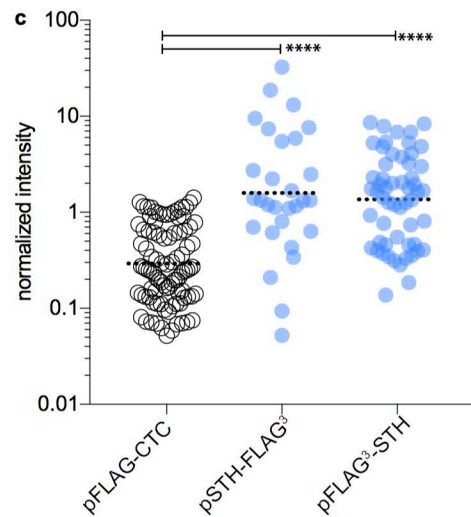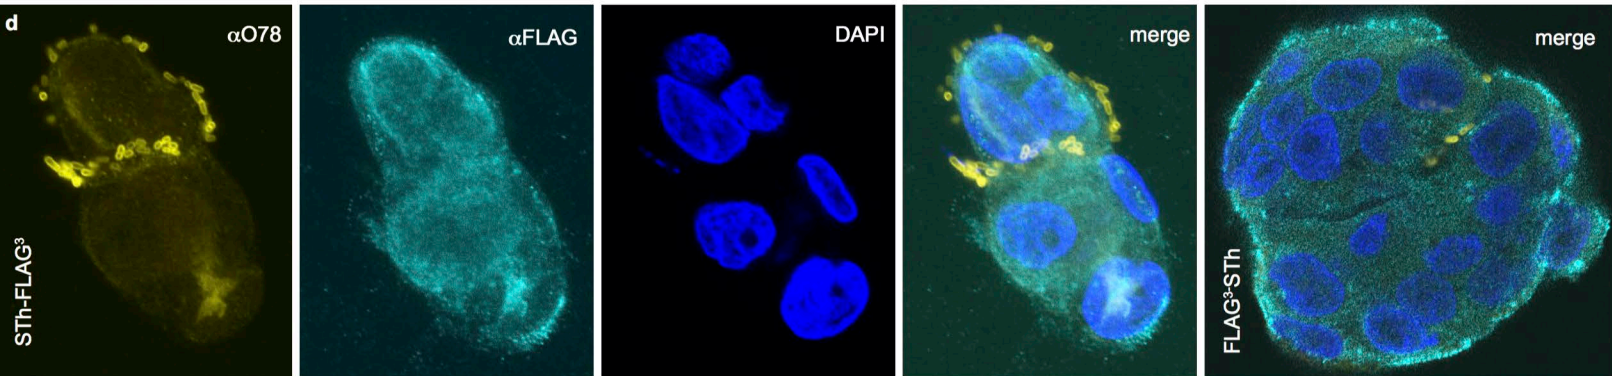

Source: http://biorxiv.org/content/10.1101/299313v1.full.pdf
